1 **Flat Electrode Contacts for Peripheral Nerve Stimulation**

2

3 **Authors:** Jesse E Bucksot<sup>1\*</sup>, Andrew J Wells<sup>1</sup>, Kimiya C Rahebi<sup>2</sup>, Vishnoukumaar Sivaji<sup>1</sup>, Mario  
4 Romero-Ortega<sup>1,2</sup>, Michael P Kilgard<sup>1,2,3</sup>, Robert L Rennaker II<sup>1,2,3</sup>, Seth A Hays<sup>1,2,3,\*</sup>

5 **Affiliations:**

6 <sup>1</sup> The University of Texas at Dallas, Erik Jonsson School of Engineering and Computer Science,  
7 Richardson, Texas, U.S.

8 <sup>2</sup> Texas Biomedical Device Center, Richardson, Texas, U.S.

9 <sup>3</sup> The University of Texas at Dallas, School of Behavioral Brain Sciences, Richardson, Texas, U.S.

## 10 **Abstract**

11 The majority of available systems for nerve stimulation use circumferential stimulation electrodes inside  
12 an insulating cuff, which produce largely uniform current density within the nerve. Flat stimulation  
13 electrodes that contact only one side of the nerve may provide advantages including simpler  
14 implantation, ease of production, and more resistance to mechanical failure. However, it is possible that  
15 the flat configuration will yield inefficient fiber recruitment due to a less uniform current distribution  
16 within the nerve. Here we tested the hypothesis that flat electrodes will require higher current amplitude  
17 to achieve effective stimulation than circumferential designs. Computational modeling and in vivo  
18 experiments were performed to evaluate fiber recruitment in different nerves and different species using  
19 a variety of electrode designs. Initial results demonstrated similar fiber recruitment in the rat vagus and  
20 sciatic nerves with a standard circumferential cuff electrode and a cuff electrode modified to  
21 approximate a flat configuration. Follow up experiments comparing true flat electrodes to  
22 circumferential electrodes on the rabbit sciatic nerve confirmed that fiber recruitment was equivalent  
23 between the two designs. These findings demonstrate that flat electrodes represent a viable design for  
24 nerve stimulation that may provide advantages over the current circumferential designs for applications  
25 in which the goal is uniform activation of the nerve.

26

## 27 **Introduction**

28 Peripheral nerve stimulation has emerged as an effective treatment for a variety of disorders. Vagus  
29 nerve stimulation (VNS) is one of the most widely used peripheral nerve stimulation strategies and has  
30 been employed in over 70,000 patients for control of epilepsy (1). Recent clinical studies demonstrate  
31 the potential of VNS for treatment of other neurological disorders, including stroke (2), tinnitus (3), and  
32 headache (4). Other emerging nerve stimulation therapies include tibial nerve stimulation for bladder  
33 control (5), sacral nerve stimulation for constipation (6), occipital nerve stimulation for migraines (7),  
34 and hypoglossal nerve stimulation for sleep apnea (8). Given the broad potential applications for  
35 neurological disorders, there is a great deal of interest in identifying optimal stimulation strategies to  
36 maximize benefits in patients (9).

37 Implanted cuff electrodes are the gold-standard method for nerve stimulation. The majority of recent  
38 developments have been focused on selective stimulation of certain regions or fascicles within the nerve  
39 (10–12). Such designs could potentially eliminate side-effects that arise due to stimulation of off-target  
40 fibers and could allow for more precise stimulation of target fibers. However, in other applications  
41 including VNS, the primary goal based on existing evidence is to generate uniform activation of each  
42 region of the nerve. This is typically done with circumferential or helical electrodes that cover the  
43 majority of the circumference of the nerve. These designs provide largely uniform stimulation within the  
44 nerve yielding a steep recruitment curve and ensuring that any desired fibers are activated with minimal  
45 current.

46 Alternative designs may provide better avenues for nerve stimulation and obviate common issues such  
47 as a high rate of lead breakage (13). A flat configuration with electrode contacts on one side of the nerve  
48 could be built with a simpler and more compact design that would facilitate implantation, provide

49 greater resistance to mechanical failure, and reduce cost of production. However, this electrode  
50 geometry provides contact with only a portion of the circumference of the nerve, which is likely to  
51 produce non-uniform stimulation. This would yield increased activation of axons near the contacts and  
52 reduced activation of distant axons. The resulting polarity would lead to a lower threshold and higher  
53 point of saturation and thus a less steep recruitment curve. Whether the magnitude of this effect would  
54 substantially influence efficacy is not known. A direct comparison of flat and circumferential cuff  
55 electrodes is needed to determine if flat contacts represent a practical alternative for nerve stimulation.

56

57

## 58 **Materials and Methods**

### 59 **Computational Model**

60 A 3D model was created in Comsol (COMSOL Multiphysics® Version 5.3) consisting of a nerve with a  
61 single fascicle, perineurium, epineurium, two platinum contacts, an insulating cuff, and ambient  
62 medium, similar to previous studies (14,15). In a subset of models, a multi-fascicle nerve containing five  
63 fascicles was used (Fig. 9). The nerve had a diameter of either 0.9 mm for the rat sciatic, 0.4 mm for the  
64 rat vagus, or 3 mm for the rabbit sciatic (16–18). Perineurium thickness was set to 3% of the fascicle  
65 diameter (19). Epineurium thickness was set to 0.13 mm for the rat sciatic, 0.1 mm for the rat vagus, and  
66 0.43 mm for the rabbit sciatic (20–22). To investigate the effect of nerve size, the rabbit sciatic model  
67 was scaled from 4 times smaller to 1.5 times larger. For both rat nerves, the insulating cuffs had an inner  
68 diameter of 1 mm and outer diameter of 2 mm. For the rabbit sciatic, insulating cuffs had an inner  
69 diameter of 3.02 mm and outer diameter of 5.2 mm. Platinum contacts had a thickness of 0.01 mm. Flat  
70 contacts used in the rabbit model had a width of 2 mm and length of 1.5 mm in the axial direction. The  
71 cross-sectional area of the nerve and of the cuff lumen was matched between the circumferential and flat  
72 electrode models by increasing the inner diameter of the flat cuff by 8.67%. The nerve was modified to  
73 take on the shape of the flat cuff (Fig. 6) (23). Helical electrodes with a width of 0.7mm and thickness of  
74 0.01mm had a pitch of 2 mm and completed a 270° arc. The insulation had the same pitch and  
75 completed 2.5 turns. The width of the insulation was 1.4 mm and the thickness was 0.9 mm. The empty  
76 space in all models was filled with an ambient medium with conductance varying from saline (2 S/m) to  
77 fat (0.04 S/m). For the rat models, ambient mediums were 20 mm in length and 4 mm in diameter. For  
78 the rabbit models, they were 120 mm in length and 40 mm in diameter. The outer boundaries of all  
79 models were grounded. A 1 mA positive current was applied on one contact, and a 1 mA negative

80 current on the other. Due to the model being purely resistive, the voltage field only needed to be solved  
81 for a single current amplitude. Electrical properties for each material were based on field standards and  
82 can be found in table S1 (24–27).

83 Once the Comsol model was solved, the voltage distribution inside the fascicle was exported and read  
84 into a NEURON model consisting of 500 parallel axons uniformly distributed throughout the fascicle.  
85 The multi-fascicle nerve had 100 axons in each of the five fascicles. Axons were designed using the  
86 model created by McIntyre, Richardson, and Grill (28). All electrical parameters were identical in this  
87 study, but the geometric parameters were interpolated using either a 1<sup>st</sup> or 2<sup>nd</sup> order polynomial. All  
88 fitted functions can be found in table S2. Each fiber was set to the length of the corresponding Comsol  
89 model, either 20 mm or 120 mm. Diameters were taken from a normal distribution meant to represent A-  
90 fibers (rat sciatic:  $6.87 \pm 3.02 \mu\text{m}$ , rat vagus:  $2.5 \pm 0.75 \mu\text{m}$ , rabbit sciatic:  $8.85 \pm 3.1 \mu\text{m}$ ) (29,30). Rat  
91 vagus fiber diameters were estimated based on the conduction velocity of the fibers mediating the  
92 Hering-Breuer reflex (31–34). In both sciatic models, fibers with a diameter less than  $2 \mu\text{m}$  were  
93 recreated until their diameter was greater than  $2 \mu\text{m}$ . In the vagus model, the same technique was  
94 applied but with a cutoff of  $1 \mu\text{m}$ .

95 After a 0.5 ms delay to ensure all axons had reached a steady baseline, a biphasic pulse of varying  
96 current amplitude was applied to the NEURON model. The voltage field calculated in Comsol was  
97 linearly scaled to the specified current and applied for 0.1 ms, and then the inverse was applied  
98 immediately after for another 0.1 ms. Voltage traces from nodes at the proximal end of the axon were  
99 recorded and used to determine whether that axon was activated at the given current amplitude. The  
100 activation data was used to create dose-response curves showing the percentage of axons activated as a  
101 function of current amplitude.

102

## 103 **Animal Experiments**

104 All handling, housing, stimulation, and surgical procedures were approved by The University of Texas  
105 at Dallas Institutional Animal Care and Use Committee. Twelve Sprague Dawley female rats (Charles  
106 River, 3 to 6 months old, 250 to 500 g) were housed in a 12:12 h reverse light-dark cycle. Six rats were  
107 used for sciatic experiments, and six rats were used for vagus experiments. Four New Zealand white  
108 male rabbits (Charles River, 3 to 6 months old, 2 to 4 kg) were housed in a 12:12 h light-dark cycle. All  
109 four rabbits were used for sciatic experiments.

110

## 111 **Electrodes**

112 Rat experiments were performed using custom-made cuff electrodes. All cuff electrodes were hand-  
113 made according to standard procedures (35). The cuffs were insulated with 3 to 6 mm sections of  
114 polyurethane tubing with an inner diameter of 1 mm and outer diameter of 2 mm. Electrodes were multi-  
115 stranded platinum-iridium wire with a diameter of 0.01 mm. For the circumferential cuff electrode,  
116 platinum-iridium wires covered a 270° arc inside the cuff . To approximate a flat electrode, partial  
117 contacts were used which only covered a 60° arc. Additionally, an intermediate electrode was tested  
118 with a 120° arc. All electrode impedances were measured in saline before testing to ensure proper  
119 construction.

120 Rabbit experiments were performed using both custom-made circumferential electrodes and  
121 manufactured flat electrodes. The circumferential electrodes were made using the same materials and  
122 protocol as the rat cuff electrodes but sized to accommodate the larger rabbit sciatic nerve (3 mm inner  
123 diameter, 4.5 mm outer diameter, 270° arc). Flat electrodes consisted of PCBs connected to two

124 rectangular platinum contacts (36). All on-board components were encapsulated and hermetically sealed  
125 in glass. Current controlled stimulation was delivered with this device using an on-board microcontroller  
126 with a digital to analog converter (DAC). Analog output from the DAC was amplified by an op-amp  
127 with a maximum current of 1.2 mA. The rectangular contacts were attached to the surface of the glass  
128 and connected to the PCB through hermetic through glass vias. A 9-turn 3-layer coil was used as an  
129 antenna for power reception and communication. A silicone sleeve was fitted around the device to serve  
130 as an insulating cuff.

131

## 132 **Rat Sciatic Nerve Stimulation**

133 Rats were anesthetized using ketamine hydrochloride (80 mg/kg, intraperitoneal (IP) injection) and  
134 xylazine (10 mg/kg, IP) and given supplemental doses as needed. Once the surgical site was shaved, an  
135 incision was made on the skin directly above the biceps femoris (16,37). The sciatic nerve was exposed  
136 by dissecting under the biceps femoris. The gastrocnemius muscle was separated from skin and  
137 surrounding tissue. Cuff electrodes were then placed on the sciatic nerve with leads connected to an  
138 isolated programmable stimulator (Model 4100; A-M Systems™; Sequim, WA). The nerve was left in  
139 place underneath the biceps femoris and the cavity was kept full of saline at all times to ensure that the  
140 cuff would be operating in a uniform medium with conductance similar to tissue. The Achilles tendon  
141 was severed at the ankle and affixed to a force transducer using nylon sutures. The foot was clamped  
142 and secured to a stereotaxic frame to prevent movement of the leg during stimulation and to isolate  
143 recordings from the gastrocnemius muscle.

144 Stimulation was delivered through the A-M Systems™ Model 4100. Voltage traces were recorded using  
145 a digital oscilloscope (PicoScope® 2204A; Pico Technology; Tyler, TX). The force of muscle



146 contraction was recorded through a force transducer (2kg EBB Load Cell; Transducer Techniques;  
147 Temecula, CA) which was connected to an analog channel on an Arduino® Mega 2560. All components  
148 were integrated using MATLAB®. Data was sampled at 10 Hz.

149 Stimulation consisted of 0.5 second trains of biphasic pulses (100  $\mu$ s pulse width) at 30 Hz with varying  
150 current amplitudes ranging from 20-800  $\mu$ A. Stimulation intensities were randomly interleaved. Values  
151 for current were manually set in each experiment to ensure that the range of values included the entire  
152 dose-response curve. Stimulation was delivered every 15 seconds and each parameter was repeated in  
153 triplicate.

154

## 155 **Rat Vagus Nerve Stimulation**

156 Rats were anesthetized using ketamine hydrochloride (80 mg/kg, IP) and xylazine (10 mg/kg, IP) and  
157 given supplemental doses as needed. An incision and blunt dissection of the muscles in the neck  
158 exposed the left cervical vagus nerve, according to standard procedures (38–40). The nerve was placed  
159 into the cuff electrode, and leads from the electrode were connected to the programmable stimulator.  
160 The cavity was kept full of saline at all times. To assess activation of the vagus nerve, blood oxygen  
161 saturation (SpO<sub>2</sub>) was recorded using a pulse-oximeter (Starr Life Sciences™, MouseOx Plus®) as  
162 previously described (32). Data was read into MATLAB® using a Starr Link Plus™ with the outputs  
163 connected to analog channels on the Arduino®. Data was sampled at 10 Hz and filtered with a 10  
164 sample moving average filter.

165 Stimulation consisted of 5 second trains of biphasic pulses (100  $\mu$ s pulse width) at 30 Hz with varying  
166 current amplitudes ranging from 50-2500  $\mu$ A. Values for current were randomly interleaved.

167 Stimulation was delivered every 60 seconds, but was delayed if needed to allow the oxygen saturation to  
168 return to baseline. Each parameter was repeated twice.

### 169 *Rabbit Sciatic Nerve Stimulation*

170 Both hind legs of the rabbit were shaved over the incision site the day before surgery. Anesthesia was  
171 induced with 3% inhaled isoflurane at 3 L/min. A single intraperitoneal injection of ketamine  
172 hydrochloride (35 mg/kg) and xylazine (5 mg/kg) was given after induction. Isoflurane was maintained  
173 throughout the experiment. Eye ointment was applied to both eyes to prevent drying. Rectal temperature  
174 and breathing were monitored throughout the procedure. The incision sites were cleaned with 70%  
175 ethanol, followed by povidone-iodine, followed again by 70% ethanol. An incision site was made along  
176 the axis of the femur. The sciatic nerve was exposed with blunt dissection to separate the biceps femoris  
177 and quadriceps femoris muscles. Alm retractors were placed to allow cuff implantation. After placing  
178 the cuff around the nerve, the retractors were withdrawn.

179 Stimulation consisted of 0.5 second trains of biphasic pulses (100  $\mu$ s pulse width) at 10 Hz with varying  
180 current amplitudes ranging from 20-1600  $\mu$ A. Stimulation using the circumferential cuff electrode was  
181 delivered using the same system described above for the rat sciatic. Stimulation with the glass-  
182 encapsulated electrode was delivered directly from the PCB. The on board stimulation circuit had a  
183 resolution of 33 $\mu$ A, which was too large to accurately fit sigmoid functions to the fiber recruitment  
184 curve in most cases. Values for current were randomly interleaved. Stimulation was delivered every 5  
185 seconds and each parameter was repeated in triplicate. Data was sampled at 500 Hz using the same load  
186 cell collection system described above.

187

188

## 189 **Analysis and Statistical Comparisons**

190 All responses were normalized to the maximum response recorded in each subject. Raw, non-  
191 normalized responses are included in the supplementary information (Fig. S4-S6). Dose-response curves  
192 were fitted with a sigmoid function (Fig. 1c). Restrictions were placed on the fitted curve such that the  
193 point at 1% of  $Y_{\max}$  could not be at a negative current intensity. For each curve, the slope was calculated  
194 at the midpoint of the fitted function. The threshold was determined by finding the lowest current  
195 amplitude that always resulted in a change in the signal of force or SpO2 greater than 3x the standard  
196 deviation of the preceding 1 second of signal for muscle activation or 10 seconds of signal for SpO2.  
197 The saturation point was determined by finding the lowest current value that produced a change in the  
198 signal greater than 90% of the mean of the top 50% of the curve. The dynamic range was calculated as

Fig 1. Analysis of fiber recruitment. a) To assess sciatic nerve recruitment, we measured force of hindlimb muscle contraction in response to a range of stimulation intensities. Shaded region represents stimulation at 30Hz for 0.5 seconds. b) To measure vagus nerve recruitment, we measured reductions in SpO2. Shaded region represents stimulation at 30Hz for 5 seconds. c) An example recruitment curve with a fitted sigmoid function and all outcome measures identified.

199 the saturation point minus the current value one step below the threshold. All analyses were verified by a  
200 blinded experimenter.

201 Data reported in the text and figures represent mean  $\pm$  standard error of the mean (SEM). The sample  
202 size shown in each figure is equal to the total number of experiments performed with each electrode  
203 design, not the number of animals. Thresholds, saturation points, dynamic ranges, and slope of each  
204 electrode design were compared on the rat sciatic using a one-way ANOVA after confirming equal  
205 variance with a Bartlett test. Individual comparisons were made using post-hoc Tukey-Kramer tests. For  
206 the rat vagus and rabbit sciatic, the variance of each metric was compared with a two-sample F-test and

207 then the data were compared using a two tailed two-sample t-test with either equal or unequal variance  
208 depending on the F-test. The statistical test used for each comparison is noted in the text. All  
209 calculations were performed in MATLAB.

210

## 211 **Results**

### 212 **One-sided and circumferential electrodes provide equivalent recruitment** 213 **of rat sciatic nerve**

214 Flat electrode contacts that do not surround the entire nerve may yield less efficient fiber recruitment  
215 than circumferential electrode contacts. We tested recruitment efficacy using computational modeling  
216 and *in vivo* experiments on the rat sciatic nerve. To represent flat electrodes, we used a modified  
217 circumferential electrode that only provided 60° of coverage compared to the standard 270° (Fig. 3b).  
218 Fiber recruitment functions were created using the 60° and 270° designs as well as an intermediate 120°  
219 design.

### 220 **Model**

221 We used computational modeling to evaluate fiber recruitment using multiple electrode designs with  
222 different values for angle of coverage, contact spacing, cuff overhang, and cuff inner diameter. Reducing  
223 the angle of coverage had a small effect on recruitment (Fig. 2d). The smallest angle (30°) required  
224 105.2  $\mu\text{A}$  to recruit 5% of fibers ( $i_{5\%}$ ) whereas the standard angle (270°) required 143.4  $\mu\text{A}$ . To recruit  
225 95% of fibers ( $i_{95\%}$ ), the smallest angle required 311.7  $\mu\text{A}$  and the standard angle required 296.0  $\mu\text{A}$ .

Fig 2. Modeling the effect of various cuff electrode parameters on recruitment of rat sciatic nerve. Recruitment curves were generated with different values for several design parameters. a) Increasing the inner diameter of the cuff (1 mm contact separation, 1 mm cuff overhang, 270°) drastically reduces recruitment. b) Increasing the distance between the two stimulating contacts (1 mm cuff inner diameter, 1 mm cuff overhang, 270°) increases recruitment. c) Increasing the amount of cuff overhang (1 mm cuff inner diameter, 1 mm contact separation, 270°) increases recruitment. d) Reducing the angle of coverage (1 mm cuff inner diameter, 1 mm contact separation, 1 mm cuff overhang) has minimal effect on recruitment.

226

227 Unlike angle of coverage, the other three variables strongly influenced recruitment. With a standard  
228 270° arc, increasing the inner diameter of the cuff had the strongest effect on recruitment, greatly  
229 increasing both the threshold and saturation current (Fig. 2a; 1 mm:  $i_{5\%}=143.4 \mu\text{A}$ ,  $i_{95\%}=296.0 \mu\text{A}$ ; 1.2  
230 mm:  $i_{5\%}=378.6 \mu\text{A}$ ,  $i_{95\%}=807.7 \mu\text{A}$ ). Increasing the distance between the contacts lowered both the  
231 threshold and saturation current (Fig. 2b; 0.25 mm:  $i_{5\%}=332.3 \mu\text{A}$ ,  $i_{95\%}=697.3 \mu\text{A}$ ; 5 mm:  $i_{5\%}=41.8 \mu\text{A}$ ,  
232  $i_{95\%}=119.2 \mu\text{A}$ ). Increasing the amount of cuff overhang lowered both the threshold and saturation  
233 current (Fig. 2c; 0.5 mm:  $i_{5\%}=232.3 \mu\text{A}$ ,  $i_{95\%}=490.0 \mu\text{A}$ ; 4.5 mm:  $i_{5\%}=88.4 \mu\text{A}$ ,  $i_{95\%}=202.1 \mu\text{A}$ ).  
234 Compared to the impact of the three other variables, angle of coverage was the least important factor,  
235 suggesting that it is not a critical factor in electrode design and flat electrodes would achieve saturation  
236 at similar current amplitudes to circumferential electrodes. Varying the cuff inner diameter, contact  
237 separation, and cuff overhang on a 60° electrode demonstrated that each variable affects an electrode  
238 with a shorter arc just as it does a standard electrode (Fig. S1).

## 239 **Empirical**

240 To confirm modeling predictions, we evaluated nerve recruitment in the rat sciatic nerve using the 60°,  
241 120°, and 270° electrodes. In vivo data closely resembled data derived from the model, with flat and  
242 circumferential contacts demonstrating comparable fiber recruitment. No significant differences were  
243 found between recruitment thresholds for any of the electrode configurations (Fig. 3d; 60°:  $131.7 \pm 14.2$   
244  $\mu\text{A}$ , 120°:  $134.4 \pm 18.3 \mu\text{A}$ , 270°:  $135.0 \pm 15.4 \mu\text{A}$ ; Bartlett's test,  $\chi^2(0.05, 2)=0.110$ ,  $p=0.94639$ , one-  
245 way ANOVA,  $F(2, 29)=0.01$ ,  $p=0.986$ ). Additionally, ANOVA did not reveal differences in saturation  
246 current, dynamic range, or slope between the electrode designs (Saturation: Fig. 3e, 60°:  $205.0 \pm 23.6$   
247  $\mu\text{A}$ , 120°:  $195.6 \pm 27.2 \mu\text{A}$ , 270°:  $176.4 \pm 20.0 \mu\text{A}$ , Bartlett's test,  $\chi^2(0.05, 2)=0.448$ ,  $p=0.799$ , one-way

248 ANOVA,  $F(2, 29)=0.41$ ,  $p=0.569$ ; Dynamic range: Fig. 3f,  $60^\circ$ :  $93.3 \pm 13.6 \mu\text{A}$ ,  $120^\circ$ :  $80.0 \pm 10.5 \mu\text{A}$ ,  
249  $270^\circ$ :  $60.0 \pm 7.6 \mu\text{A}$ , Bartlett's test,  $\chi^2(0.05, 2)=4.310$ ,  $p=0.116$ , one-way ANOVA,  $F(2, 29)=2.41$ ,  
250  $p=0.0647$ ; Slope: Fig. 3g,  $60^\circ$ :  $2.21 \pm 0.31 \text{ \%Force}/\mu\text{A}$ ,  $120^\circ$ :  $2.63 \pm 0.41 \text{ \%Force}/\mu\text{A}$ ,  $270^\circ$ :  $3.71 \pm 0.63$   
251  $\text{ \%Force}/\mu\text{A}$ , Bartlett's test,  $\chi^2(0.05, 2)=3.195$ ,  $p=0.202$ , one-way ANOVA,  $F(2, 29)=3.03$ ,  $p=0.065$ .  
252 These results confirm that the one-sided electrodes and circumferential electrodes yield equivalent nerve  
253 recruitment across a range of stimulation intensities.

Fig 3. Approximately flat electrode does not reduce fiber recruitment in rat sciatic nerve. a) Schematic diagram of the experimental setup. b) Schematic diagram of the three cuff electrode designs tested on the rat sciatic nerve. c) Force generated as a function of stimulation intensity for each electrode design. All geometries result in similar recruitment. Shaded regions represent SEM. d-g) Thresholds, saturation currents, dynamic ranges, and slopes are similar for each electrode design. Data indicate mean  $\pm$  SEM, and circles represent individual data.

254

## 255 **One-sided electrodes recruit more efficiently than circumferential** 256 **electrodes in the rat vagus nerve**

257 We next tested recruitment using the same  $60^\circ$  and  $270^\circ$  cuff electrodes on the rat vagus nerve, which  
258 has a smaller diameter and different fascicular organization.

### 259 **Model**

260 Modeling of the rat vagus showed an unexpected result: decreasing the angle of the electrodes improved  
261 recruitment by decreasing both the threshold and saturation current (Fig. 4a;  $30^\circ$ :  $i_{5\%}=101.6 \mu\text{A}$ ,  
262  $i_{95\%}=224.3 \mu\text{A}$ ;  $270^\circ$ :  $i_{5\%}=262.0 \mu\text{A}$ ,  $i_{95\%}=532.4 \mu\text{A}$ ). To explain this result, three follow up tests were  
263 run. In the original model, the vagus nerve was positioned at the bottom of the cuff lumen very close to  
264 the contacts to match the experimental prep. The first two follow up tests changed the nerve's position to

265 be either in the middle of the cuff or on the opposite side from the contacts. When the nerve was in the  
266 middle of the cuff, changing the angle of coverage had no effect on recruitment (Fig. 4b; 30°:  $i_{5\%}=315.9$   
267  $\mu\text{A}$ ,  $i_{95\%}=679.4 \mu\text{A}$ ; 270°:  $i_{5\%}=324.3 \mu\text{A}$ ,  $i_{95\%}=674.0 \mu\text{A}$ ). When the nerve was on the opposite side of  
268 the cuff, reducing angle of coverage increased both the threshold and saturation current (Fig. 4c; 30°:  
269  $i_{5\%}=467.4 \mu\text{A}$ ,  $i_{95\%}=1013.9 \mu\text{A}$ ; 270°:  $i_{5\%}=357.9 \mu\text{A}$ ,  $i_{95\%}=735.5 \mu\text{A}$ ). The final follow up test varied the  
270 angle of coverage inside of a cuff which was properly sized for the rat vagus (0.44 mm inner diameter).  
271 In this case, varying the angle of coverage once again had minimal effect on recruitment (Fig. 4d; 30°:  
272  $i_{5\%}=20.5 \mu\text{A}$ ,  $i_{95\%}=42.0 \mu\text{A}$ ; 270°:  $i_{5\%}=24.2 \mu\text{A}$ ,  $i_{95\%}=47.2 \mu\text{A}$ ). These data suggest that in a cuff that is  
273 significantly larger than the nerve, the vagus benefits from the increased current density near the  
274 contacts present with shorter angles of coverage without being affected by the decreased current density  
275 far from the contacts.

Fig 4. Reducing angle of coverage increases fiber recruitment in a model of the rat vagus nerve. a) Recruitment curves generated using a cuff with a 1 mm inner diameter, but with the nerve positioned at next to the contacts. Reducing the angle increases recruitment. b) Recruitment curves generated using a cuff with a 1 mm inner diameter, but with the nerve positioned in the middle of the cuff lumen. Reducing the angle has no effect. c) Recruitment curves generated using a cuff with a 1 mm inner diameter, but with the nerve on the opposite side of the cuff lumen from the contacts. Reducing the angle decreases recruitment. d) Recruitment curves generated by modeling cuff electrodes with various angles of completion around the rat vagus. Instead of a 1 mm inner diameter, the cuff diameter was set to 0.44 mm to keep the ratio of the cuff diameter to nerve the same as in the sciatic model. When the cuff is sized to fit the nerve, reducing the angle has little effect on fiber recruitment.

276

## 277 **Empirical**

278 We next sought to confirm these findings *in vivo*. To evaluate activation of vagus nerve fibers, we  
279 measured rapid stimulation-dependent reduction in oxygen saturation, a well-described biomarker of



280 vagus nerve stimulation ascribed to activation of the Hering-Breuer reflex (32). Stimulation of vagal A-  
281 fibers, including the pulmonary stretch receptors, temporarily prevents inhalation and causes blood  
282 oxygen saturation to fall (Fig. 5a) (31). As a result, measurement of oxygen saturation provides a simple  
283 means to assess vagal A-fiber recruitment.

Fig 5. Reducing angle of coverage to approximate a flat electrode increases fiber recruitment in rat vagus nerve. a) Schematic diagram of the experimental setup. b) Schematic diagram of the two cuff electrode designs tested on the rat vagus nerve. c) Decreases in SpO<sub>2</sub>, a biomarker of vagal activation, as a function of stimulation intensity for each electrode design (y-axis is percent of maximum reduction). Similar to modeling results, the decreased angle of coverage generates more efficient nerve recruitment. d-g) Thresholds are similar for each design. The 60° electrodes displayed reduced saturation current, dynamic range, and increased slope compared to the 270° electrodes. Data indicate mean ± SEM, and circles represent individual data.

284 The 60° electrodes recruited fibers more effectively than the 270° electrodes, corroborating findings  
285 from the model. A trend toward reduced threshold was observed with the 60° electrode, although this  
286 failed to achieve statistical significance (Fig. 5d; 60°:  $238.9 \pm 26.1 \mu\text{A}$ , 270°:  $344.4 \pm 41.2 \mu\text{A}$ ; two  
287 tailed paired t-test,  $p=0.0508$ ). The 60° electrode displayed a significantly reduced saturation current,  
288 dynamic range, and increased slope compared to the 270° electrode (Saturation: Fig. 5e, 60°:  $700 \pm$   
289  $102.7 \mu\text{A}$ , 270°:  $1222 \pm 139.2 \mu\text{A}$ , two tailed paired t-test,  $p=8.5 \times 10^{-3}$ ; Dynamic Range: Fig. 5f, 60°:  
290  $538.9 \pm 93.5 \mu\text{A}$ , 270°:  $1000 \pm 135.4 \mu\text{A}$ , two tailed paired t-test,  $p=0.014$ ; Slope: Fig. 5g, 60°:  $0.320 \pm$   
291  $0.047$ , 270°:  $0.164 \pm 0.026$ , two tailed paired t-test,  $p=0.0165$ ). Both the model and empirical data  
292 demonstrate that the one-sided electrodes have a steeper recruitment curve and lower saturation current  
293 than circumferential electrodes.

294

295

## 296 **Flat and circumferential electrodes provide equivalent recruitment in** 297 **rabbit sciatic nerve**

298 The results presented above support the notion that flat electrodes provide at least as effective fiber  
299 recruitment as circumferential electrodes. However, whereas the 60° electrodes used in the above  
300 experiments contact only a single side of the nerve similar to a flat electrode, they are not truly flat and  
301 thus do not capture all the features of the geometry that may influence fiber recruitment. Therefore, we  
302 sought to confirm these results using a true flat electrode. The electrode was manufactured on a printed  
303 circuit board (PCB), encapsulated in glass, and inserted into a silicone sleeve that acted as an insulating  
304 cuff (Fig. 8c). These electrodes were tested on the rabbit sciatic nerve, which is an order of magnitude  
305 larger than the rat sciatic nerve (16,18).

### 306 **Model**

307 We performed modeling to evaluate recruitment using flat contacts and circumferential contacts. The  
308 cross-sectional area of the nerve and of the cuff lumen was matched between the circumferential and flat  
309 electrode models by increasing the inner diameter of the flat cuff by 8.67% and modifying the nerve  
310 shape to fit (Fig. 6) (23). Flat and circumferential designs had similar thresholds and saturation currents  
311 (Fig. 6; Flat:  $i_{5\%}=76.1 \mu\text{A}$ ,  $i_{95\%}=278.6 \mu\text{A}$ ; Circumferential:  $i_{5\%}=81.4 \mu\text{A}$ ,  $i_{95\%}=253.1 \mu\text{A}$ ). Next, flat and  
312 circumferential electrodes were compared in different ambient mediums with conductivities ranging  
313 from fat to saline. Decreasing the conductivity of the ambient medium increased recruitment, but the  
314 comparable recruitment observed with flat and circumferential contacts was consistent in all cases (Fig.  
315 7a). Flat and circumferential electrodes were compared on nerves of varying size by increasing or  
316 decreasing the spatial scale of the original rabbit sciatic model. Larger nerves required more current to  
317 achieve similar levels of fiber recruitment, but once again, flat and circumferential electrodes were

318 similar in all cases (Fig. 7b). A helical cuff electrode, like those used in clinical VNS applications,  
319 provides similar recruitment to the flat electrode design (Fig. S2). On a multi-fascicle nerve, flat and  
320 circumferential electrodes provided similar recruitment of the whole nerve despite each fascicle being  
321 recruited differently. These data suggest that flat electrodes recruit fibers similarly to currently used  
322 electrode designs.

Fig 6. Flat and circumferential electrodes provide similar recruitment in a model of the rabbit sciatic nerve. Recruitment curves generated by modeling cuff electrodes around the rabbit sciatic nerve with either flat or circumferential contacts. Note the similarity in fiber recruitment.

Fig 7. Models of flat and circumferential electrodes in various extracellular media and on various nerve sizes. a) Recruitment curves generated by modeling flat and circumferential electrodes in various ambient mediums. The conductivity of the ambient medium was varied from saline to fat. As expected, the extracellular medium influences recruitment efficiency, but recruitment is similar between the two electrode designs in all cases. b) Recruitment curves generated by modeling flat and circumferential electrodes on various diameter nerves. All features of the cuff electrode were kept proportional and scaled to match the nerve. In all cases, recruitment is similar between the two designs.

## 323 **Empirical**

324 To confirm modeling predictions, we evaluated nerve recruitment in the rabbit sciatic nerve by  
325 measuring the force of muscle contraction. No difference was found between the thresholds, saturation  
Fig 8. Flat and circumferential electrodes provide similar recruitment of rabbit sciatic nerve. a) Schematic diagram of the  
experimental setup. b) Schematic diagram of the two cuff electrode designs tested on the rabbit sciatic nerve. c) Force  
generated as a function of stimulation intensity for flat and circumferential electrodes. Both designs achieve efficient  
recruitment of the sciatic nerve, consistent with modeling predictions. d-f) Thresholds, saturation current, and dynamic  
range are similar for each electrode design. Data indicate mean  $\pm$  SEM, and circles represent individual data.

326 currents, or dynamic ranges (Threshold: Fig. 8d, Circumferential:  $390.0 \pm 14.8 \mu\text{A}$ , Flat:  $351 \pm 41.5 \mu\text{A}$ ,  
327 two-sample F-test,  $F(5, 4)=9.397$ ,  $p=0.0497$ , two tailed two-sample t-test with unequal variance:  
328  $p=0.4167$ ; Saturation: Fig. 8e, Circumferential:  $514.0 \pm 10.8 \mu\text{A}$ , Flat:  $430.0 \pm 46.0 \mu\text{A}$ , two-sample F-  
329 test,  $F(5, 4)=21.931$ ,  $p=0.011$ , two tailed two-sample t-test with unequal variance:  $p=0.1301$ ; Dynamic  
330 Range: Fig. 8f, Circumferential:  $148.0 \pm 21.5 \mu\text{A}$ , Flat:  $111.7 \pm 18.3 \mu\text{A}$ , two-sample F-test,  $F(5,$   
331  $4)=0.8693$ ,  $p=0.860$ , two tailed two-sample t-test with equal variance:  $p=0.228$ ). These results confirm  
332 that flat electrodes recruit fibers equivalently to circumferential electrodes.

333

## 334 Discussion

335 In this study, we examined the viability of flat electrodes for nerve stimulation. Circumferential  
336 electrode contacts were compared to flat electrode contacts on multiple nerves and in multiple species.  
337 We find that in all cases tested, recruitment is either equivalent or the flat contacts have a steeper  
338 recruitment function and lower saturation current.

339 Flat electrodes that only contact a single side of the nerve could provide multiple advantages over the  
340 currently used circumferential designs which wrap around the majority of the circumference of the  
341 nerve. However, flat electrodes may require more current to achieve the same amount of fiber

342 recruitment. On the rat sciatic nerve, both modeling and empirical data demonstrate that the reduced  
343 angle of coverage, approximating a flat electrode, provides comparable fiber recruitment to  
344 circumferential contacts across a wide range of current intensities. These results suggest that flat  
345 electrodes will recruit comparably to circumferential electrodes.

346 It is plausible that nerve diameter and fascicular organization could differentially affect recruitment with  
347 various electrode designs. Unexpectedly, the one-sided electrode contacts provided more efficient  
348 recruitment of the rat vagus nerve fibers than the circumferential contacts. There was once again no  
349 difference in the thresholds, but the 60° contacts had a steeper recruitment curve and lower saturation  
350 current, indicating more efficacious fiber recruitment. The modeling data confirmed these results, which  
351 can be ascribed to the relatively small size of the vagus nerve compared to the inner diameter of the  
352 insulating cuff. The diameter of the vagus nerve is around 0.4 mm, less than one half that of the sciatic,  
353 and thus the nerve occupies a substantially smaller cross-sectional area inside the cuff. Cuffs were  
354 always placed such that the vagus was resting at the bottom of the cuff and in the middle of the contacts.  
355 Additionally, injection current density was higher with the 60° electrodes given their reduced surface  
356 area compared to the 270° electrodes (41). Due to the small size of the nerve relative to the cuff, its  
357 position, and the increased current density near the contacts present with the 60° design, the current  
358 density within the nerve was higher with the smaller contact angle. Model results suggest that this is  
359 only true when the nerve is at the bottom of the cuff and the cuff is significantly larger than the nerve. If  
360 the nerve was moved to the opposite side of the cuff, far away from the contacts, the opposite  
361 relationship was seen (Fig. 4c), and if the cuff was sized appropriately for the vagus, the 60° contacts did  
362 not appear significantly different from the 270° contacts (Fig. 4d). Regardless, the modeling and  
363 empirical data support the notion that flat electrodes provide at least equivalent fiber recruitment.

364 Whereas the 60° electrode contacts used in the rat experiments contact only a single side of the nerve  
365 similar to flat contacts, it is still possible that a true flat electrode would yield significantly less effective  
366 fiber recruitment. Thus, we tested nerve activation in the rabbit sciatic nerve using a true flat electrode  
367 manufactured on a PCB and compared recruitment to a standard circumferential electrode. Similar to the  
368 rat experiments, modeling and empirical testing revealed no substantial difference in fiber recruitment  
369 between the flat and circumferential electrode contacts. These results provide further evidence in an  
370 independent replicate that flat contacts stimulate as effectively as circumferential contacts. Furthermore,  
371 the devices used in these experiments were simple PCBs, which illustrates the convenience of using flat  
372 contacts.

373 For applications in which recruitment of all areas within the nerve is desired, flat electrodes appear to be  
374 a suitable alternative to the standard circumferential and helical electrodes. However, it is still unclear  
375 how each electrode design recruits individual fascicles within the nerve. Depending on the orientation of  
376 the nerve relative to the electrodes, the threshold for activation of any given fascicle will change (42). If  
377 there is any difference between electrode types, it is likely small as there were no significant differences  
378 in the empirical data, and both the vagus and the sciatic nerves have several fascicles, but this could  
379 explain the high variance in thresholds seen when testing flat electrodes on the rabbit sciatic nerve. The  
380 threshold for stimulation should be low if the target fascicle is near the electrode, but high if the fascicle  
381 is far from the electrode. A modified rabbit sciatic nerve with five fascicles was modeled with both flat  
382 and circumferential electrodes to investigate how each design is affected by the orientation of the nerve  
383 inside the cuff. The steepness of the recruitment curve for single fascicles was similar in all cases, but  
384 the variance in thresholds was greater with the flat electrodes (Fig. 9), which provides an explanation for  
385 the variance in thresholds present empirically. Fascicles on the opposite side of the nerve from the flat  
386 electrodes will have a higher threshold of activation, but the threshold is still comparable to

Fig 9. Flat electrodes result in greater threshold variability for individual fascicles, but similar recruitment of the whole nerve. a) Whole nerve recruitment curves for the four combinations modeled. b-e) Recruitment curves for each fascicle (line color corresponds to fascicle of same color) and whole nerve recruitment (thick black line).

387 circumferential electrodes, which suggests that clinical efficacy will not be reduced for applications in  
388 which whole nerve recruitment is desired.

389

390 All modeling and *in vivo* experiments in this study measured A-fiber recruitment, but many applications  
391 of nerve stimulation rely on B- and C-fibers as well (43). It is not guaranteed that flat and  
392 circumferential electrodes will recruit these other fiber types equivalently, but models of smaller  
393 diameter fibers suggest that the increase in fiber recruitment threshold would scale proportionally  
394 between the two electrode designs. Thus, while more current is required to activate smaller diameter  
395 fibers, we predict that the increase in current is likely to be similar comparing flat and circumferential  
396 designs. Further work validating this finding *in vivo* is warranted to determine if flat electrodes are  
397 viable for broader applications of nerve stimulation.

398 A major limitation of this study is the absence of empirical testing with chronically implanted  
399 electrodes. Many changes occur chronically that could result in reduced efficacy of flat electrodes such  
400 as glial scar formation, inflammation, and nerve damage (44). It is possible that some of these  
401 phenomena will affect flat electrodes differently than circumferential electrodes leading to electrode  
402 failure. Although chronic implants were not experimentally tested in this study, our modeling studies  
403 suggest that flat and circumferential electrodes provide comparable recruitment in a range of  
404 physiologically plausible extracellular media, which suggests that scar formation will not affect flat  
405 electrodes to a greater extent than it does circumferential electrodes. Future studies are needed to  
406 provide a direct empirical evaluation of the chronic efficacy of flat electrodes.

407 Additionally, there is a lack of data on larger diameter nerves (>3 mm) that would be found in humans.

408 Our modeling studies suggest that flat and circumferential electrodes are equivalent on a range of

409 clinically applicable nerve sizes. Moreover, comparison of recruitment in the rat sciatic and rabbit sciatic  
410 suggests that larger nerves require more current to achieve the same level of activation, but in both cases  
411 recruitment is comparable between flat and circumferential electrodes.

412 Our finding that larger nerves require more current to achieve similar levels of activation is intuitive.  
413 However, there is a strong body of literature showing that equivalent stimulation parameters can  
414 successfully activate rat and human nerves. This data is particularly compelling for the vagus nerve  
415 where both rats and humans exhibit enhanced memory as an inverted-U function of current intensity  
416 with the same peak (45–48). Our modeling efforts suggest a simple explanation for this surprising  
417 finding, which appears to lie in the use of tight-fitting stimulating electrodes for human studies and  
418 poorly fitting, oversized cuff electrodes for rat studies. When we modeled these configurations, we  
419 confirmed that identical VNS parameters can equivalently activate nerves of very different diameters  
420 under these conditions (Fig. 10). This is a novel result that could substantially impact both preclinical  
421 and clinical stimulation parameters. Follow up studies comparing small diameter nerves in animals to  
422 large diameter nerves in humans should be done to confirm this finding.

Fig 10: Recruitment of vagus nerve is similar in humans and rats due to cuff electrode design. Larger nerves require more current to recruit, but the therapeutic range of vagus nerve stimulation is similar in rats and humans (Fig. 7b). This phenomenon can be explained by the use of tight-fitting stimulating electrodes for human studies and poorly fitting, oversized cuff electrodes for rat studies. Cuff electrodes used in rats are significantly larger than the nerve which leads to inefficient recruitment and brings the two curves into alignment. If rat cuff electrodes were reduced in size, recruitment would be greatly increased. This is consistent with the importance of the ratio of cuff inner diameter to nerve diameter (Fig. 2a).

423



424 If a flat electrode design is used to stimulate the vagus nerve for epilepsy, it is not initially clear whether  
425 the stimulation parameters would be different from current clinical parameters, as a helical electrode  
426 design is used in clinical applications rather than a cuff electrode (49). We modeled the helical electrode  
427 design and compared vagus nerve recruitment to recruitment using a flat electrode design. The helical  
428 electrode and flat electrode demonstrated comparable recruitment. The narrow insulating structure used  
429 by the helical cuff allows some current to bypass the nerve, which increases the amount of stimulation  
430 needed compared to a complete cuff electrode (Fig. S2). The open architecture of the helical cuff is  
431 equivalent to having very little cuff overhang, which decreases recruitment compared to a full cuff (Fig.  
432 2c).

433 These results provide a framework to guide the development of new electrode designs for nerve  
434 stimulation. The difference in fiber recruitment between flat and circumferential contacts is not likely to  
435 meaningfully influence the efficacy of nerve stimulation techniques, and flat contacts may provide  
436 advantages such as greater ease of implantation, substantially reduced cost of production, and greater  
437 resistance to mechanical failure. Future studies examining the effects of electrode size and geometry  
438 may provide further insights into design features to optimize recruitment for nerve stimulation therapies.

439

440

441

442

443

444

445

#### 446 **Acknowledgements**

447 We would like to thank Stuart Cogan, Joseph Pancrazio, Jonathan Riley, Nikki Simmons, and Brandon  
448 Tran for help with modeling of fibers in NEURON, equipment setup, physiological recordings,  
449 insightful discussions, figure creation, and manuscript preparation.



451 **References**

- 452 1. Handforth A, DeGiorgio CM, Schachter SC, Uthman BM, Naritoku DK, Tecoma ES, et al. Vagus  
453 nerve stimulation therapy for partial-onset seizures. A randomized active-control trial. *Neurology*  
454 [Internet]. 1998;51(1):48–55. Available from: <http://n.neurology.org/content/51/1/48>
- 455 2. Kimberley TJ, Pierce D, Prudente CN, Francisco GE, Yozbatiran N, Smith P, et al. Vagus Nerve  
456 Stimulation Paired With Upper Limb Rehabilitation After Chronic Stroke. *Stroke* [Internet].  
457 2018;49:1–4. Available from:  
458 <https://www.ahajournals.org/doi/abs/10.1161/STROKEAHA.118.022279>
- 459 3. De Ridder D, Vanneste S, Engineer ND, Kilgard MP. Safety and efficacy of vagus nerve  
460 stimulation paired with tones for the treatment of tinnitus: A case series. *Neuromodulation*  
461 *Technol Neural Interface*. 2014;17(2):170–9.
- 462 4. Tassorelli C, Grazzi L, de Tommaso M, Pierangeli G, Martelletti P, Rainero I, et al. Noninvasive  
463 vagus nerve stimulation as acute therapy for migraine. *Neurology* [Internet]. 2018;91(4):364–73.  
464 Available from: <http://www.neurology.org/lookup/doi/10.1212/WNL.0000000000005857>
- 465 5. MacDiarmid SA, Peters KM, Shobeiri SA, Wooldridge LS, Rovner ES, Leong FC, et al. Long-  
466 Term Durability of Percutaneous Tibial Nerve Stimulation for the Treatment of Overactive  
467 Bladder. *J Urol* [Internet]. 2010;183(1):234–40. Available from:  
468 <http://dx.doi.org/10.1016/j.juro.2009.08.160>
- 469 6. Kamm MA, Dudding TC, Melenhorst J, Jarrett M, Wang Z, Buntzen S, et al. Sacral nerve  
470 stimulation for intractable constipation. *Gut*. 2010;59(3):333–40.
- 471 7. Saper JR, Dodick DW, Silberstein SD, McCarville S, Sun M, Goadsby PJ. Occipital nerve

- 472 stimulation for the treatment of intractable chronic migraine headache: ONSTIM feasibility study.  
473 Cephalalgia. 2011;31(3):271–85.
- 474 8. Eastwood PR, Barnes M, Walsh JH, Maddison KJ, Hee G, Schwartz AR, et al. Treating  
475 obstructive sleep apnea with hypoglossal nerve stimulation. Sleep [Internet]. 2011;34(11):1479–  
476 86. Available from: <http://www.ncbi.nlm.nih.gov/pubmed/22043118>
- 477 9. Birmingham K, Gradinaru V, Anikeeva P, Grill WM, Pikov V, Mclaughlin B, et al. Bioelectronic  
478 medicines: a research roadmap. 2014 [cited 2018 Jul 23]; Available from:  
479 <http://dx.doi.org/10.1038/>
- 480 10. Tan D, Schiefer M, Keith MW, Anderson R, Tyler DJ. Stability and selectivity of a chronic,  
481 multi-contact cuff electrode for sensory stimulation in a human amputee. Int IEEE/EMBS Conf  
482 Neural Eng NER. 2013;859–62.
- 483 11. Boretius T, Badia J, Pascual-Font A, Schuettler M, Navarro X, Yoshida K, et al. A transverse  
484 intrafascicular multichannel electrode (TIME) to interface with the peripheral nerve. Biosens  
485 Bioelectron [Internet]. 2010;26(1):62–9. Available from:  
486 <http://dx.doi.org/10.1016/j.bios.2010.05.010>
- 487 12. Badia J, Boretius T, Andreu D, Azevedo-Coste C, Stieglitz T, Navarro X. Comparative analysis  
488 of transverse intrafascicular multichannel, longitudinal intrafascicular and multipolar cuff  
489 electrodes for the selective stimulation of nerve fascicles. J Neural Eng. 2011;8(3).
- 490 13. Kahlow H, Olivecrona M. Complications of vagal nerve stimulation for drug-resistant epilepsy: A  
491 single center longitudinal study of 143 patients. Seizure [Internet]. 2013;22(10):827–33.  
492 Available from: <http://dx.doi.org/10.1016/j.seizure.2013.06.011>

- 493 14. Mourdoukoutas AP, Truong DQ, Adair DK, Simon BJ, Bikson M. High-Resolution Multi-Scale  
494 Computational Model for Non-Invasive Cervical Vagus Nerve Stimulation. *Neuromodulation*  
495 *Technol Neural Interface* [Internet]. 2017;2017. Available from:  
496 <http://doi.wiley.com/10.1111/ner.12706>
- 497 15. Helmers SL, Begnaud J, Cowley A, Corwin HM, Edwards JC, Holder DL, et al. Application of a  
498 computational model of vagus nerve stimulation. *Acta Neurol Scand*. 2012;126(5):336–43.
- 499 16. Shen J, Wang H-Q, Zhou C-P, Liang B-L. MAGNETIC RESONANCE  
500 MICRONEUROGRAPHY OF RABBIT SCIATIC NERVE ON A 1.5-T CLINICAL MR  
501 SYSTEM CORRELATED WITH GROSS ANATOMY. *Microsurgery*. 2010;28(1):32–6.
- 502 17. WOODBURY JW, WOODBURY DM. Vagal Stimulation Reduces the Severity of Maximal  
503 Electroshock Seizures in Intact Rats: Use of a Cuff Electrode for Stimulating and Recording.  
504 *Pacing Clin Electrophysiol*. 1991;14(1):94–107.
- 505 18. Varejão ASP, Cabrita AM, Meek MF, Bulas-Cruz J, Melo-Pinto P, Raimondo S, et al. Functional  
506 and Morphological Assessment of a Standardized Rat Sciatic Nerve Crush Injury with a Non-  
507 Serrated Clamp. *J Neurotrauma* [Internet]. 2004;21(11):1652–70. Available from:  
508 <http://www.liebertonline.com/doi/abs/10.1089/neu.2004.21.1652>
- 509 19. Grinberg Y, Schiefer MA, Tyler DJ, Gustafson KJ. Fascicular perineurium thickness, size, and  
510 position affect model predictions of neural excitation. *IEEE Trans Neural Syst Rehabil Eng*.  
511 2008;16(6):572–81.
- 512 20. Yoo PB, Lubock NB, Hincapie JG, Ruble SB, Hamann JJ, Grill WM. High-resolution  
513 measurement of electrically-evoked vagus nerve activity in the anesthetized dog. *J Neural Eng*.  
514 2013;10(2).

- 515 21. Somann JP, Albors GO, Neihouser K V., Lu KH, Liu Z, Ward MP, et al. Chronic cuffing of  
516 cervical vagus nerve inhibits efferent fiber integrity in rat model. *J Neural Eng.* 2018;15(3).
- 517 22. Islam MS, Oliveira MC, Wang Y, Henry FP, Randolph MA, Park BH, et al. Extracting structural  
518 features of rat sciatic nerve using polarization-sensitive spectral domain optical coherence  
519 tomography. *J Biomed Opt [Internet].* 2012;17(5):056012. Available from:  
520 <http://biomedicaloptics.spiedigitallibrary.org/article.aspx?doi=10.1117/1.JBO.17.5.056012>
- 521 23. Tyler DJ, Durand DM. Functionally selective peripheral nerve stimulation with a flat interface  
522 nerve electrode. *IEEE Trans Neural Syst Rehabil Eng.* 2002;10(4):294–303.
- 523 24. Veltink PH, Van Veen BK, Struijk JJ, Holsheimer J, Boom HBK. A Modeling Study of Nerve  
524 Fascicle Stimulation. *IEEE Trans Biomed Eng.* 1989;36(7):683–92.
- 525 25. Goodall E V., Kosterman LM, Holsheimer J, Struijk JJ. Modeling Study of Activation and  
526 Propagation Delays During Stimulation of Peripheral Nerve Fibers with a Tripolar Cuff  
527 Electrode. *IEEE Trans Rehabil Eng.* 1995;3(3):272–82.
- 528 26. Frieswijk TA, Smit JPA, Rutten WLC, Boom HBK. Force-current relationships in intraneural  
529 stimulation: Role of extraneural medium and motor fibre clustering. *Med Biol Eng Comput.*  
530 1998;36(4):422–9.
- 531 27. Arle JE, Carlson KW, Mei L. Investigation of mechanisms of vagus nerve stimulation for seizure  
532 using finite element modeling. *Epilepsy Res [Internet].* 2016;126:109–18. Available from:  
533 <http://dx.doi.org/10.1016/j.epilepsyres.2016.07.009>
- 534 28. McIntyre CC, Richardson AG, Grill WM. Modeling the Excitability of Mammalian Nerve Fibers:  
535 Influence of Afterpotentials on the Recovery Cycle. *J Neurophysiol [Internet].* 2002;87(2):995–

- 536 1006. Available from: <http://jn.physiology.org/lookup/doi/10.1152/jn.00353.2001>
- 537 29. Ikeda M, Oka Y. The relationship between nerve conduction velocity and fiber morphology  
538 during peripheral nerve regeneration. *Brain Behav.* 2012;2(4):382–90.
- 539 30. Germana G, Muglia U, Santoro M, Abbate F, Laura R, Gugliotta MA, et al. Morphometric  
540 analysis of sciatic nerve and its main branches in the rabbit. *Biol Struct Morphog* [Internet].  
541 1992;4(1):11–5. Available from:  
542 [http://www.ncbi.nlm.nih.gov/entrez/query.fcgi?cmd=Retrieve&db=PubMed&dopt=Citation&list](http://www.ncbi.nlm.nih.gov/entrez/query.fcgi?cmd=Retrieve&db=PubMed&dopt=Citation&list_uids=1420593)  
543 [\\_uids=1420593](http://www.ncbi.nlm.nih.gov/entrez/query.fcgi?cmd=Retrieve&db=PubMed&dopt=Citation&list_uids=1420593)
- 544 31. Chang R, Strohlic D, Williams E, Umans B, Liberles S. Vagal Sensory Neuron Subtypes that  
545 Differentially Control Breathing. *Cell.* 2015;161(3):622–33.
- 546 32. McAllen RM, Shafton AD, Bratton BO, Trevaks D, Furness JB. Calibration of thresholds for  
547 functional engagement of vagal A, B and C fiber groups in vivo. *Bioelectron Med* [Internet].  
548 2018;1(1):21–7. Available from: <http://www.futuremedicine.com/doi/10.2217/bem-2017-0001>
- 549 33. Gasser HS, Grundfest H. AXON DIAMETERS IN RELATION TO THE SPIKE DIMENSIONS  
550 AND THE CONDUCTION VELOCITY IN MAMMALIAN A FIBERS. *Am J Physiol.*  
551 1939;127(2):393–414.
- 552 34. Hursh JB. Conduction Velocity and Diameter of Nerve Fibers. *Am J Physiol Content.*  
553 1939;127(1):131–9.
- 554 35. Rios MU, Bucksot JE, Rahebi KC, Engineer CT, Michael P. Protocol for Construction of Rat  
555 Nerve Stimulation Cuff Electrodes. *Methods Protoc.* 2019;2(19):1–27.
- 556 36. Sivaji V. Wireless Devices for Peripheral Nerve Stimulation and Recording. University of Texas

- 557 at Dallas; 2018.
- 558 37. Branner A, Stein RB, Fernandez E, Aoyagi Y, Normann RA. Long-Term Stimulation and  
559 Recording with a Penetrating Microelectrode Array in Cat Sciatic Nerve. *IEEE Trans Biomed*  
560 *Eng.* 2004;51(1):146–57.
- 561 38. Borland MS, Vrana WA, Moreno NA, Fogarty EA, Buell EP, Sharma P, et al. Cortical Map  
562 Plasticity as a Function of Vagus Nerve Stimulation Intensity. *Brain Stimul* [Internet].  
563 2016;9(1):117–23. Available from: <http://dx.doi.org/10.1016/j.brs.2015.08.018>
- 564 39. Ganzer PD, Darrow MJ, Meyers EC, Solorzano BR, Ruiz AD, Robertson NM, et al. Closed-loop  
565 neuromodulation restores network connectivity and motor control after spinal cord injury. *Elife*  
566 [Internet]. 2018;7:1–19. Available from: <https://elifesciences.org/articles/32058>
- 567 40. Loerwald KW, Borland MS, Rennaker RL, Hays SA, Kilgard MP. The interaction of pulse width  
568 and current intensity on the extent of cortical plasticity evoked by vagus nerve stimulation. *Brain*  
569 *Stimul* [Internet]. 2017;11(2):271–7. Available from: <https://doi.org/10.1016/j.brs.2017.11.007>
- 570 41. Cogan SF. Neural Stimulation and Recording Electrodes. *Annu Rev Biomed Eng* [Internet]. 2008  
571 [cited 2018 Jul 30];10:275–309. Available from: [www.annualreviews.org](http://www.annualreviews.org)
- 572 42. Grill WM, Mortimer JT. Quantification of recruitment properties of multiple contact cuff  
573 electrodes. *IEEE Trans Rehabil Eng.* 1996;4(2):49–62.
- 574 43. Qing KY, Wasilczuk KM, Ward MP, Phillips EH, Vlachos PP, Goergen CJ, et al. B fibers are the  
575 best predictors of cardiac activity during Vagus nerve stimulation Qing , vagal B fiber activation  
576 and cardiac effects. 2018;1–11.
- 577 44. Cheung KC. Implantable microscale neural interfaces. 2007;(January):923–38.



- 578 45. Clark KB, Krahl SE, Smith DC, Jensen RA. Post-training unilateral vagal stimulation enhances  
579 retention performance in the rat. Vol. 63, *Neurobiology of Learning and Memory*. 1995. p. 213–6.
- 580 46. Clark KB, Smith DC, Hassert DL, Browning RA, Naritoku DK, Jensen RA. Posttraining  
581 Electrical Stimulation of Vagal Afferents with Concomitant Vagal Efferent Inactivation Enhances  
582 Memory Storage Processes in the Rat [Internet]. 1998 [cited 2018 Aug 1]. Available from:  
583 [https://ac.els-cdn.com/S1074742798938631/1-s2.0-S1074742798938631-](https://ac.els-cdn.com/S1074742798938631/1-s2.0-S1074742798938631-main.pdf?_tid=4779abf5-6708-44af-8a1f-2270db3602dc&acdnat=1533159129_91ad974012e12b5efe81cc4cc5798a6b)  
584 [main.pdf?\\_tid=4779abf5-6708-44af-8a1f-](https://ac.els-cdn.com/S1074742798938631/1-s2.0-S1074742798938631-main.pdf?_tid=4779abf5-6708-44af-8a1f-2270db3602dc&acdnat=1533159129_91ad974012e12b5efe81cc4cc5798a6b)  
585 [2270db3602dc&acdnat=1533159129\\_91ad974012e12b5efe81cc4cc5798a6b](https://ac.els-cdn.com/S1074742798938631/1-s2.0-S1074742798938631-main.pdf?_tid=4779abf5-6708-44af-8a1f-2270db3602dc&acdnat=1533159129_91ad974012e12b5efe81cc4cc5798a6b)
- 586 47. Clark KB, Naritoku DK, Smith DC, Browning RA, Jensen RA. Enhanced recognition memory  
587 following vagus nerve stimulation in human subjects. *Nat Neurosci* [Internet]. 1999 [cited 2018  
588 Aug 1];2(1):94–8. Available from: <http://neurosci.nature.com>
- 589 48. Zuo Y, Smith DC, Jensen RA. Vagus nerve stimulation potentiates hippocampal LTP in freely-  
590 moving rats. *Physiol Behav* [Internet]. 2007 [cited 2018 Aug 15];90:583–9. Available from:  
591 [https://ac.els-cdn.com/S0031938406004963/1-s2.0-S0031938406004963-](https://ac.els-cdn.com/S0031938406004963/1-s2.0-S0031938406004963-main.pdf?_tid=9a134a03-79fd-4530-8d64-e33eecd8ddf7&acdnat=1534354220_560f2f94ec5032890fbe8a759e9cf349)  
592 [main.pdf?\\_tid=9a134a03-79fd-4530-8d64-](https://ac.els-cdn.com/S0031938406004963/1-s2.0-S0031938406004963-main.pdf?_tid=9a134a03-79fd-4530-8d64-e33eecd8ddf7&acdnat=1534354220_560f2f94ec5032890fbe8a759e9cf349)  
593 [e33eecd8ddf7&acdnat=1534354220\\_560f2f94ec5032890fbe8a759e9cf349](https://ac.els-cdn.com/S0031938406004963/1-s2.0-S0031938406004963-main.pdf?_tid=9a134a03-79fd-4530-8d64-e33eecd8ddf7&acdnat=1534354220_560f2f94ec5032890fbe8a759e9cf349)
- 594 49. Ben-Menachem E, Mañon-Espaillet R, Ristanovic R, Wilder BJ, Stefan H, Mirza W, et al. Vagus  
595 Nerve Stimulation for Treatment of Partial Seizures: 1. A Controlled Study of Effect on Seizures.  
596 *Epilepsia*. 1994;35(3):616–26.
- 597
- 598

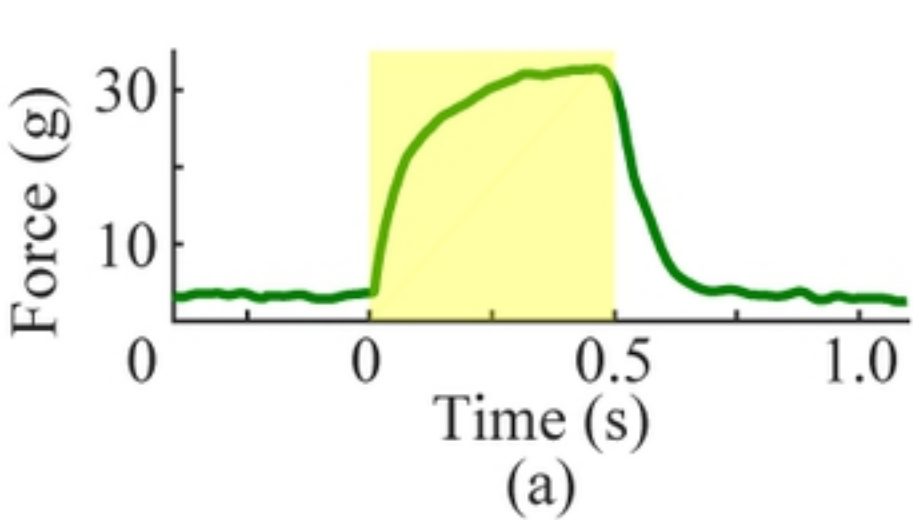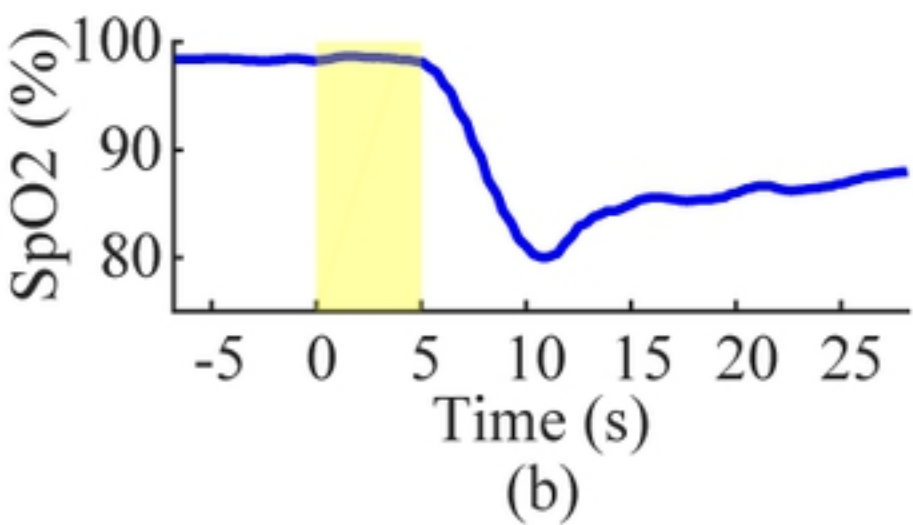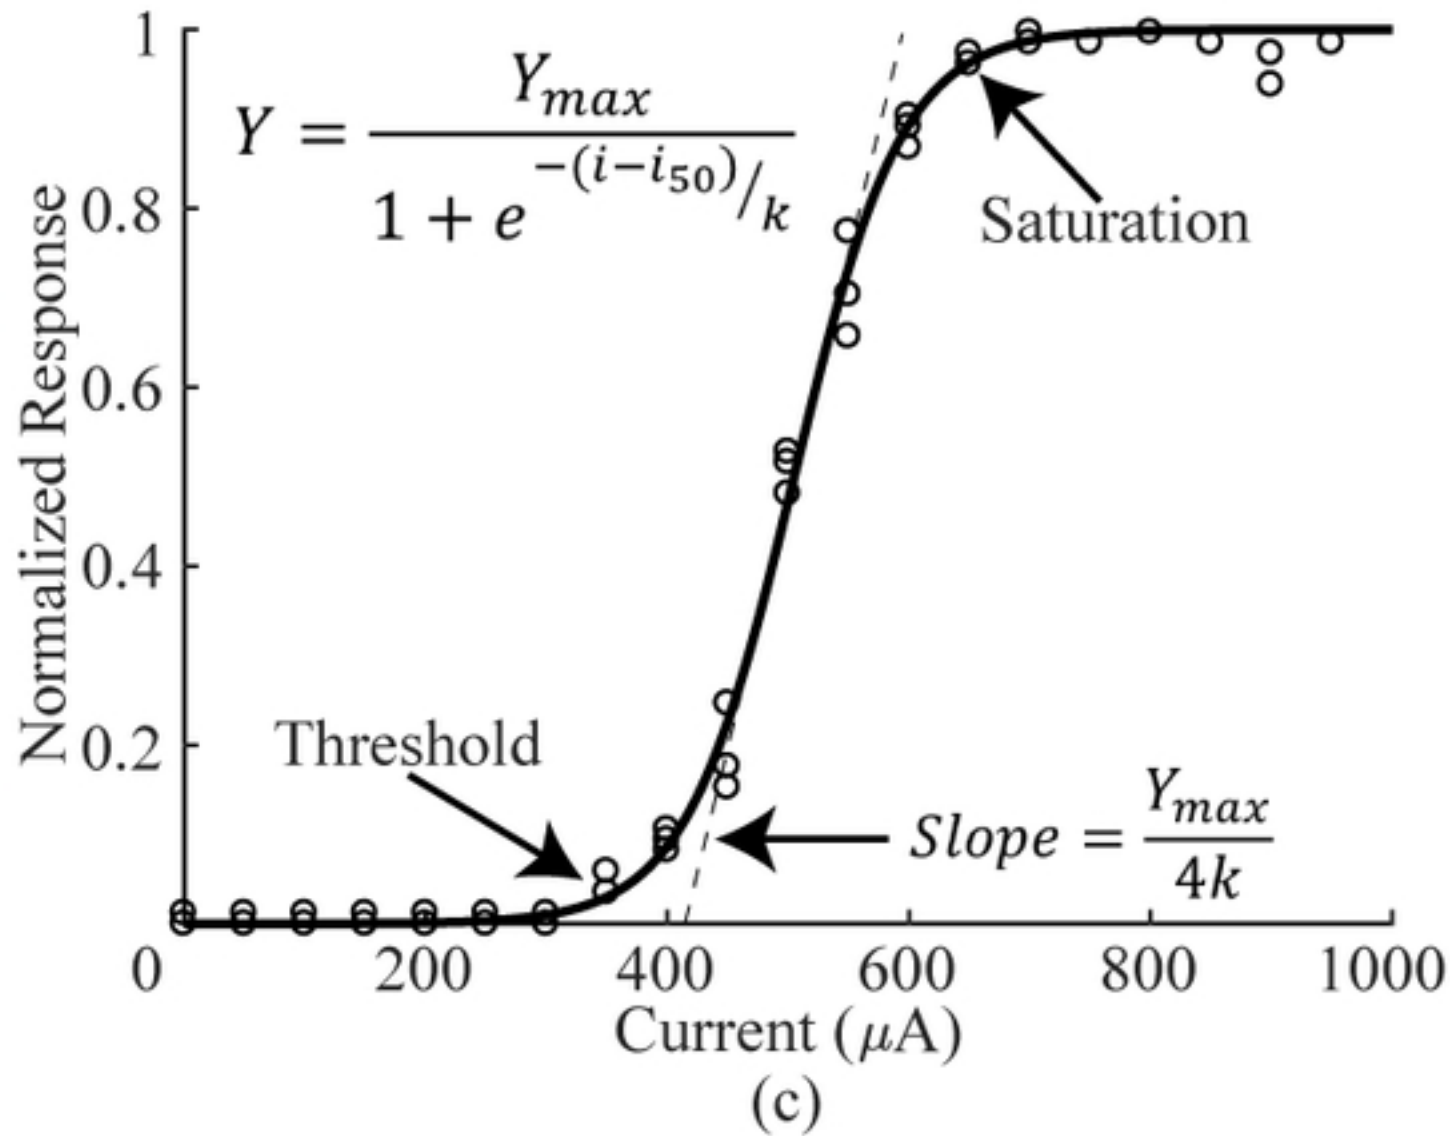

Fig1

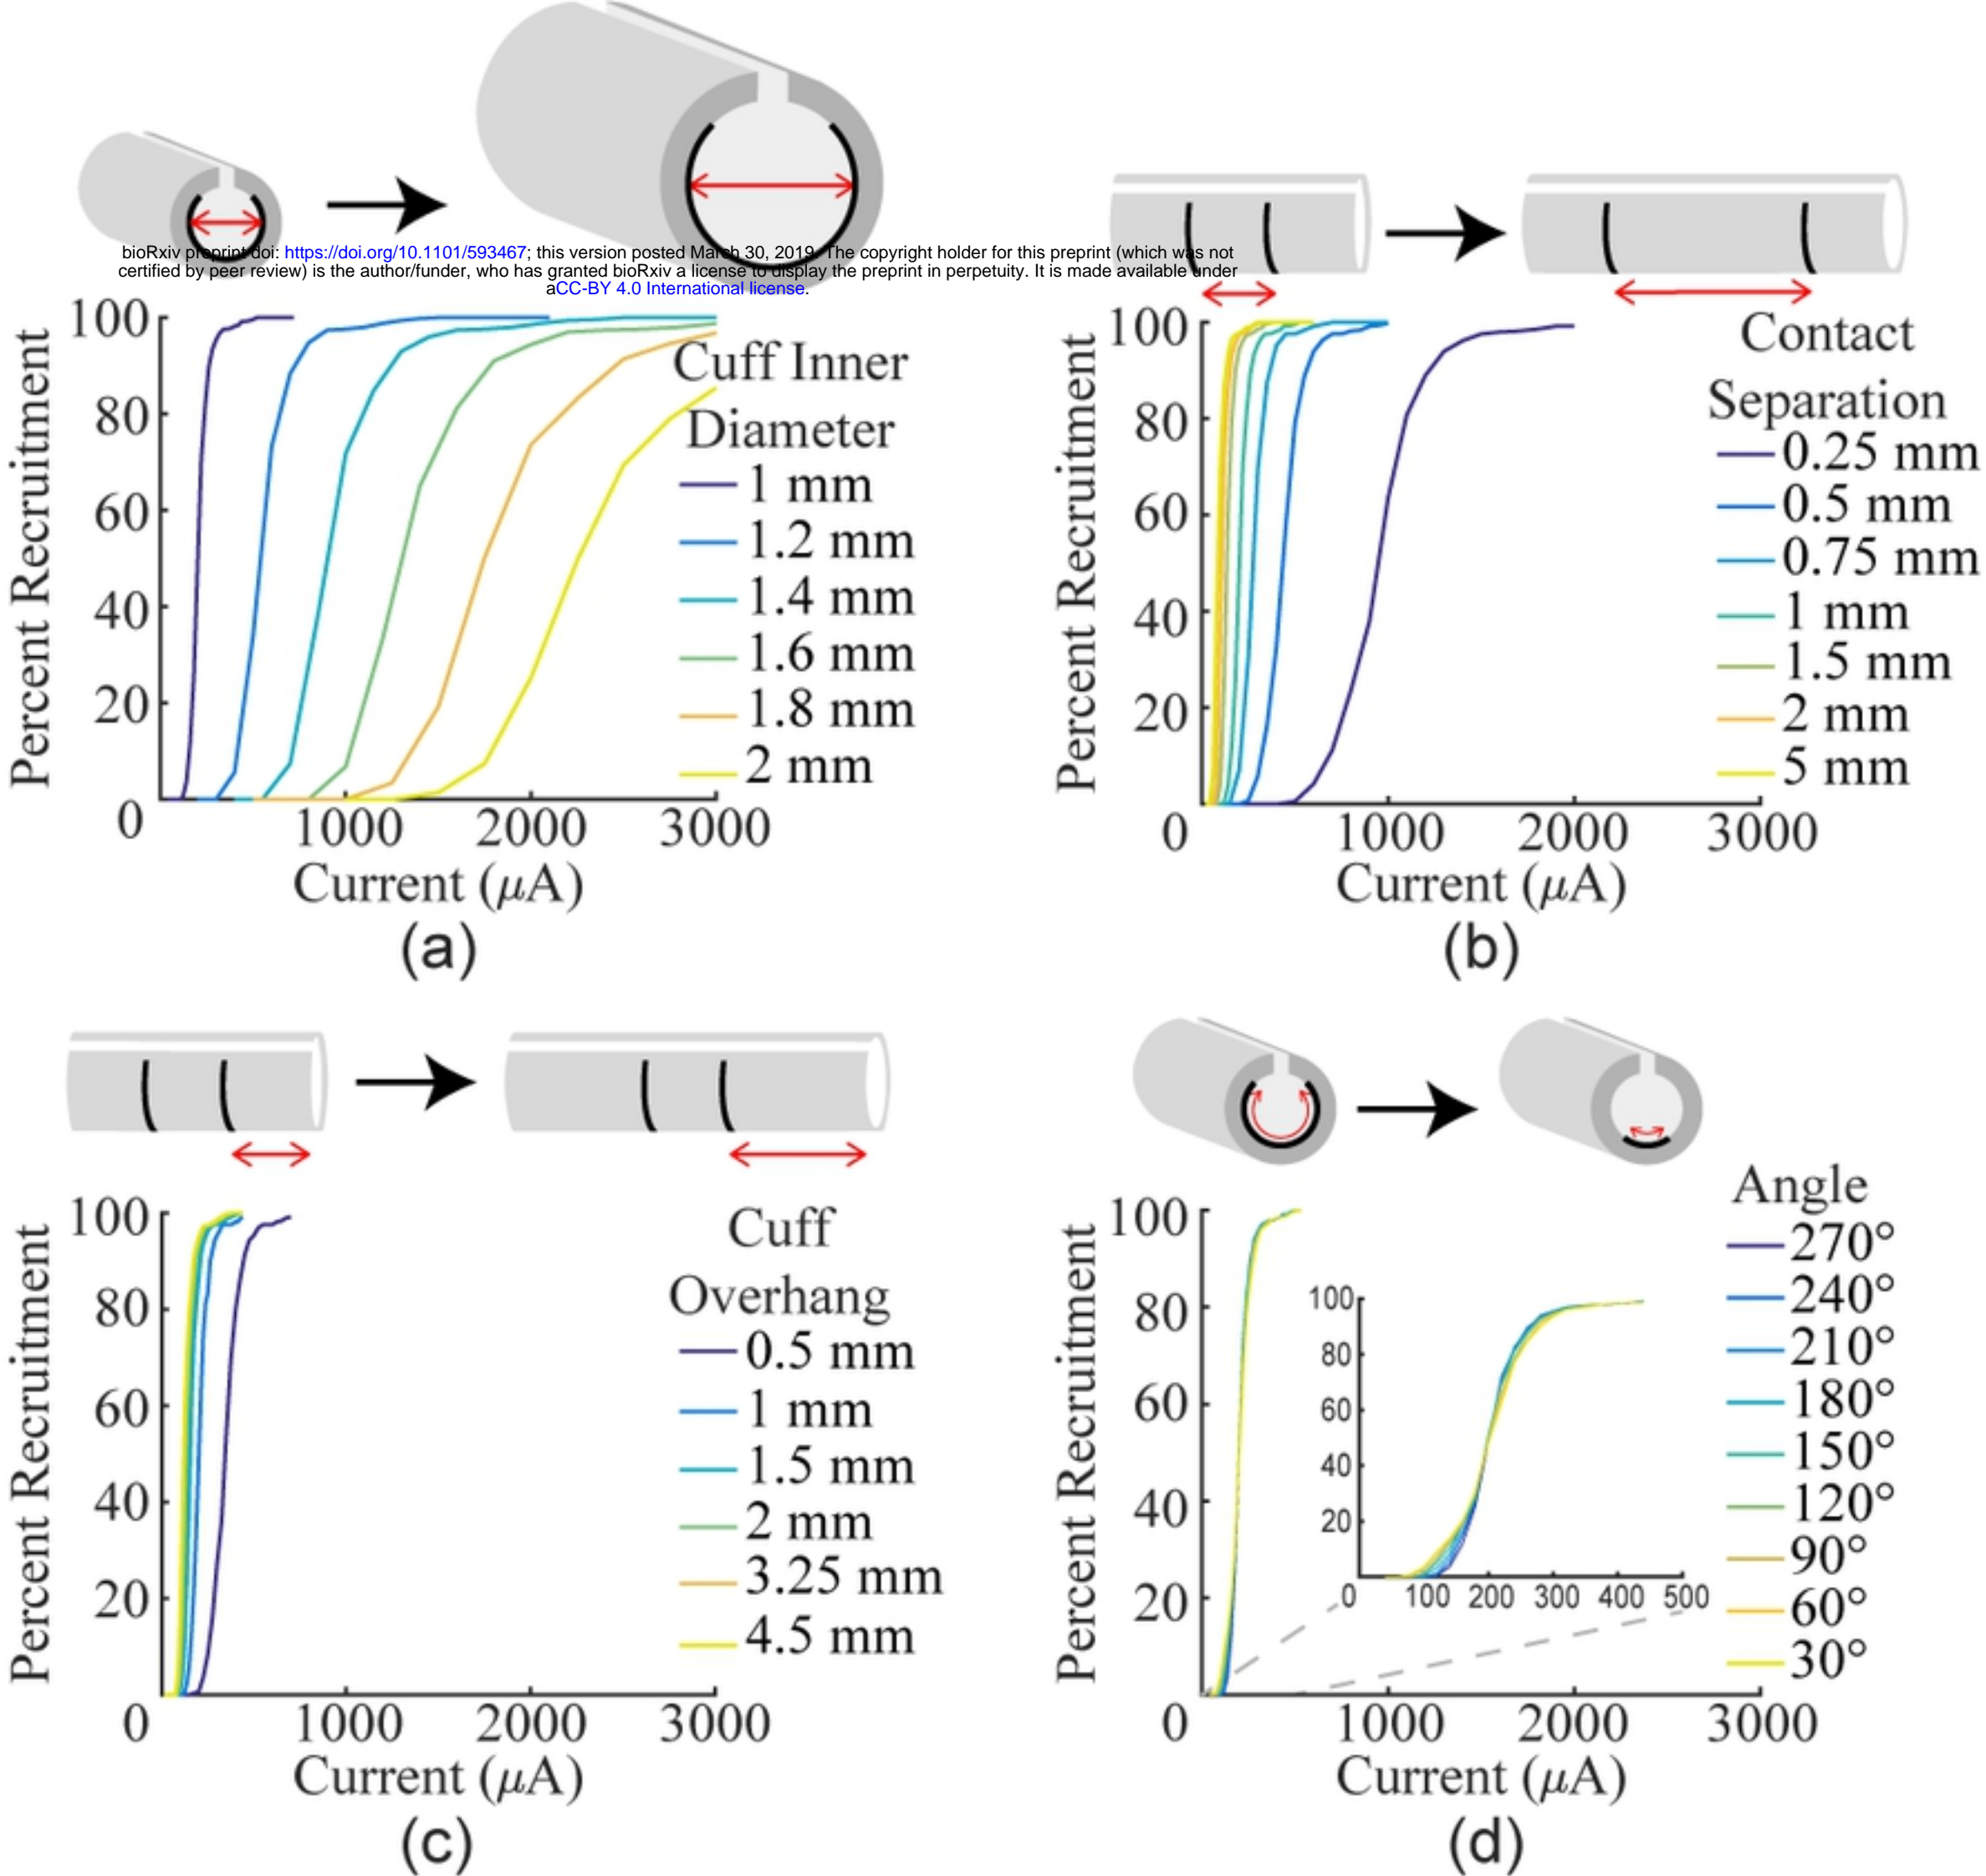

Fig2

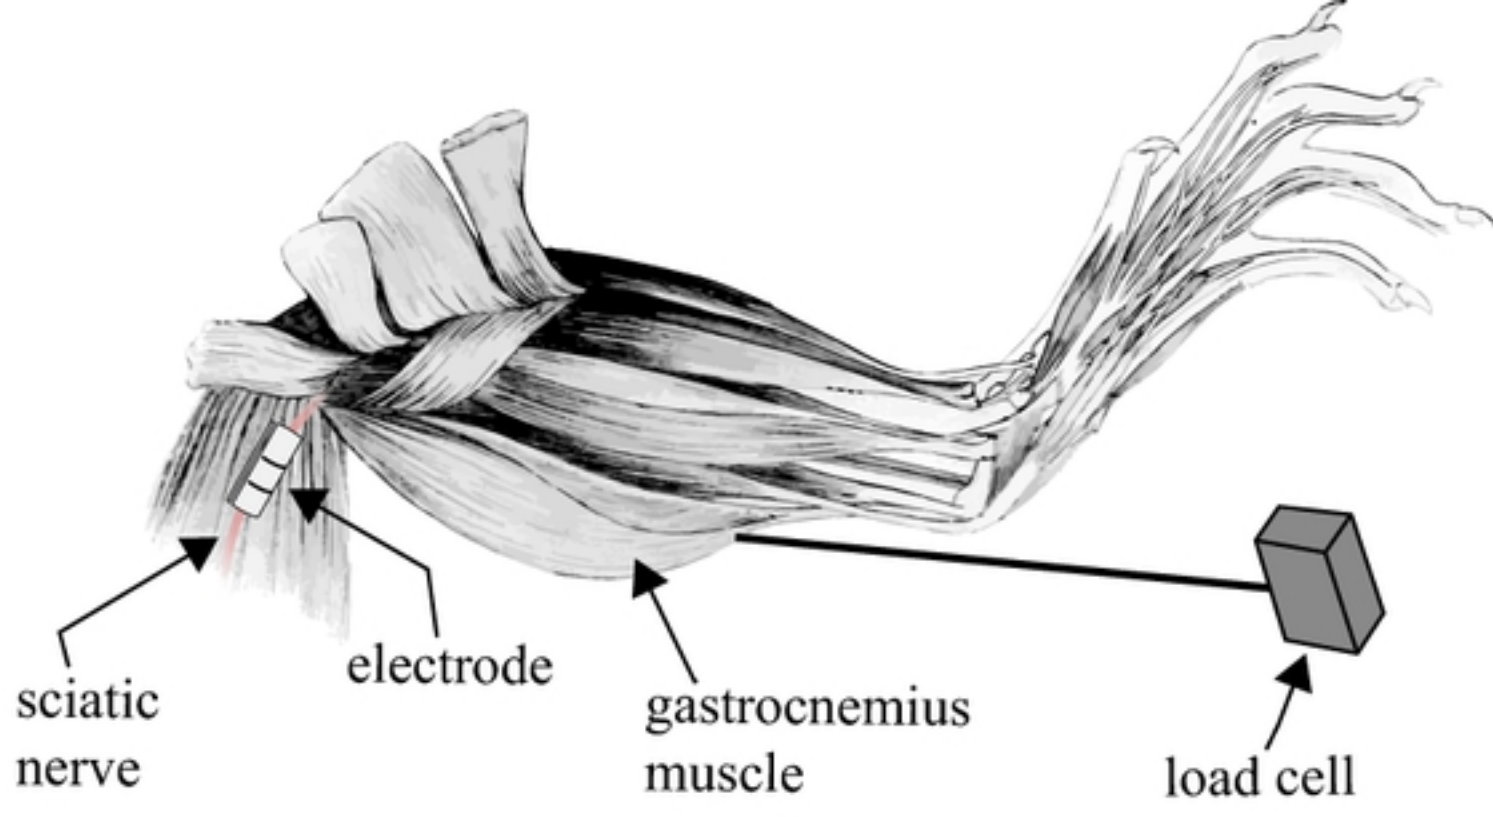

(a)

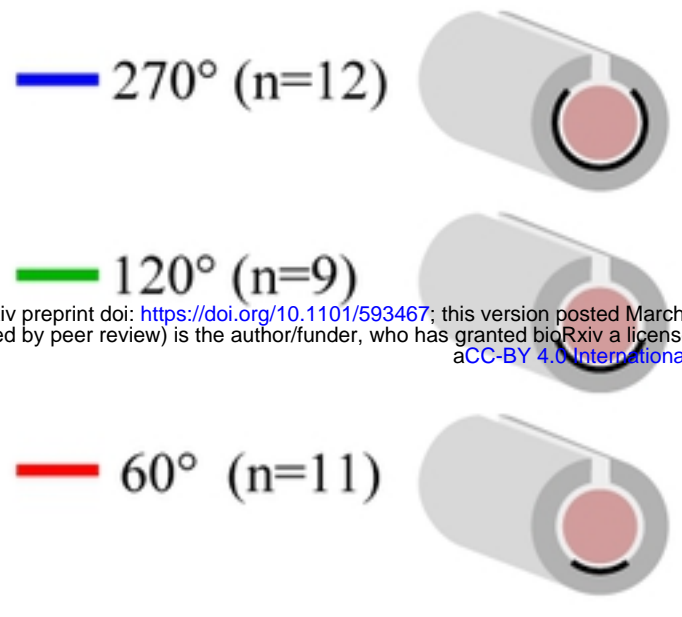

bioRxiv preprint doi: <https://doi.org/10.1101/593467>; this version posted March 30, 2019. The copyright holder for this preprint (which was not certified by peer review) is the author/funder, who has granted bioRxiv a license to display the preprint in perpetuity. It is made available under aCC-BY 4.0 International license.

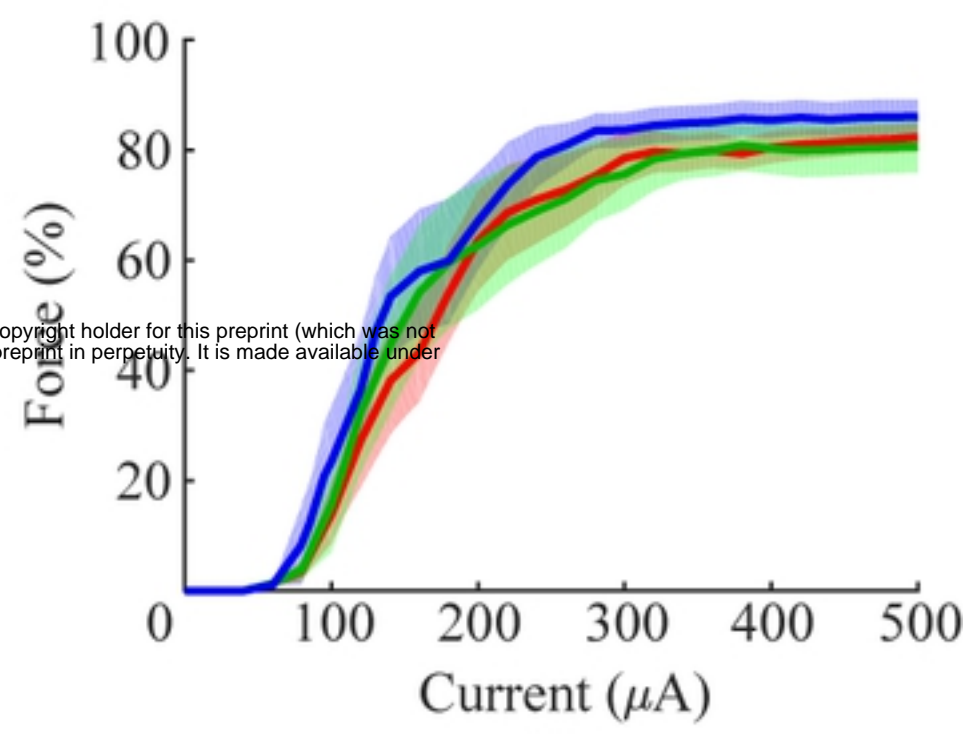

(c)

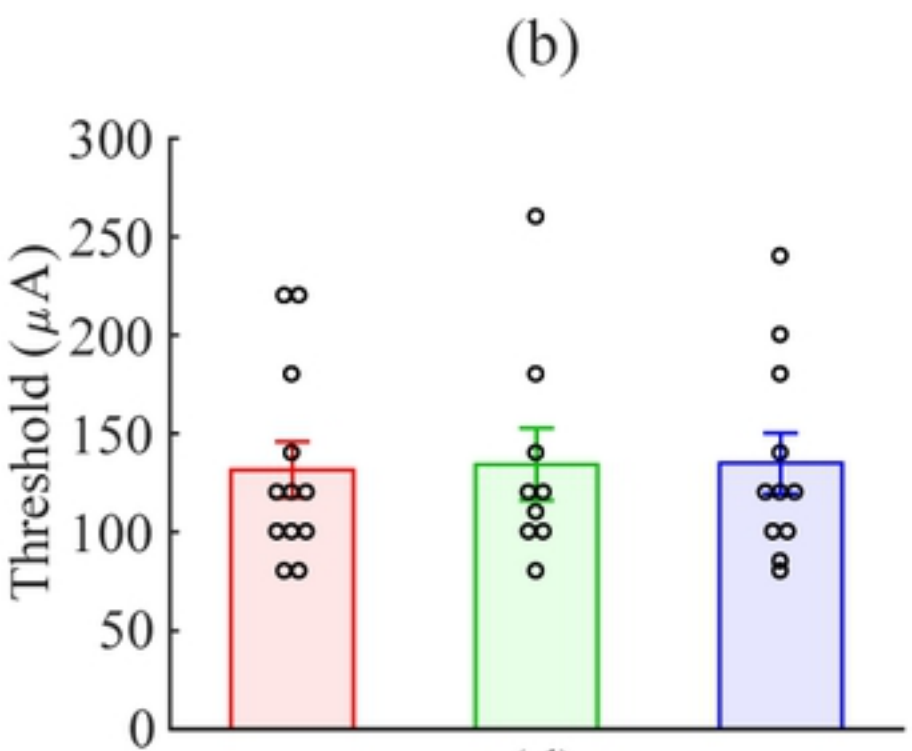

(d)

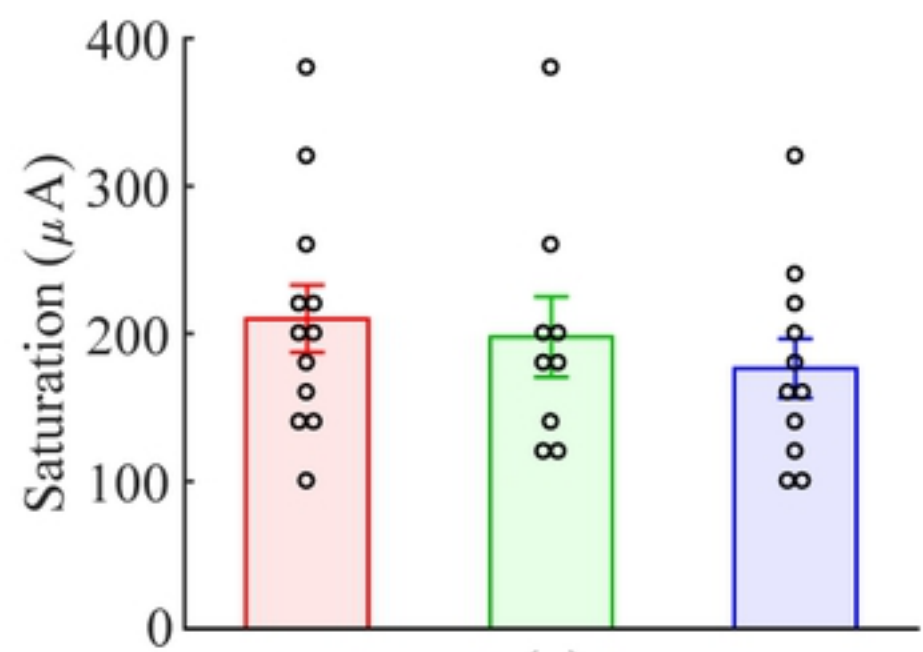

(e)

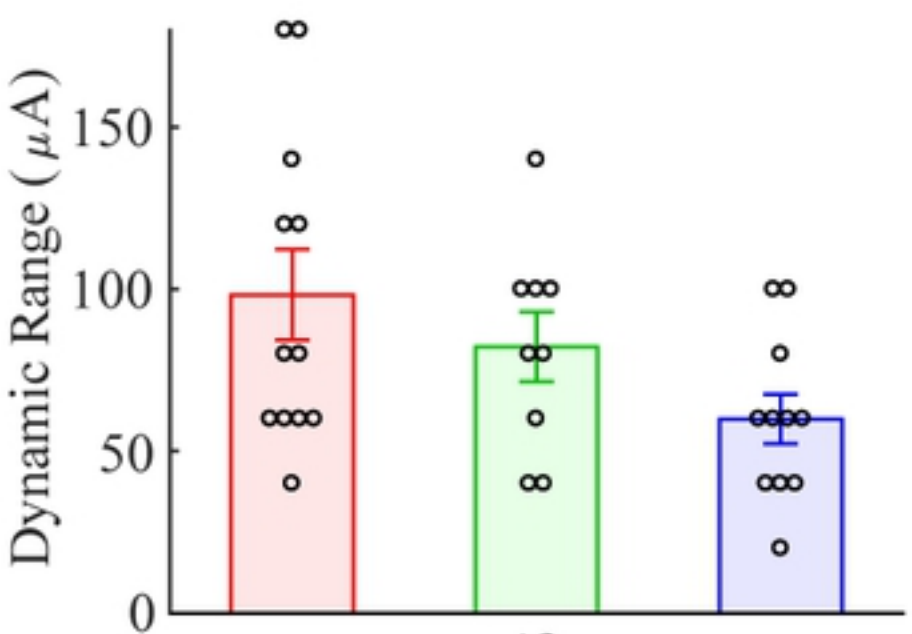

(f)

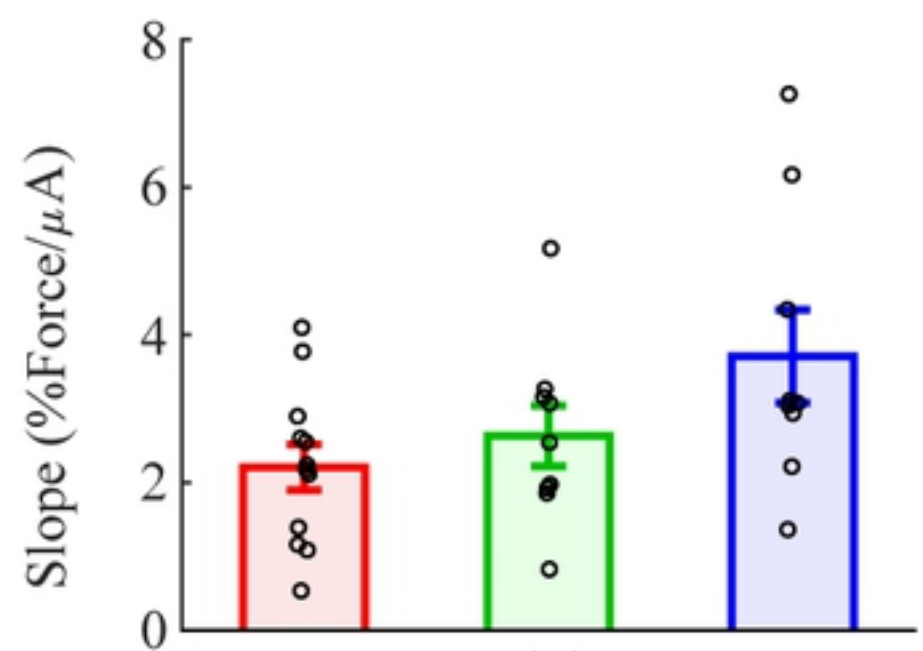

(g)

Fig3

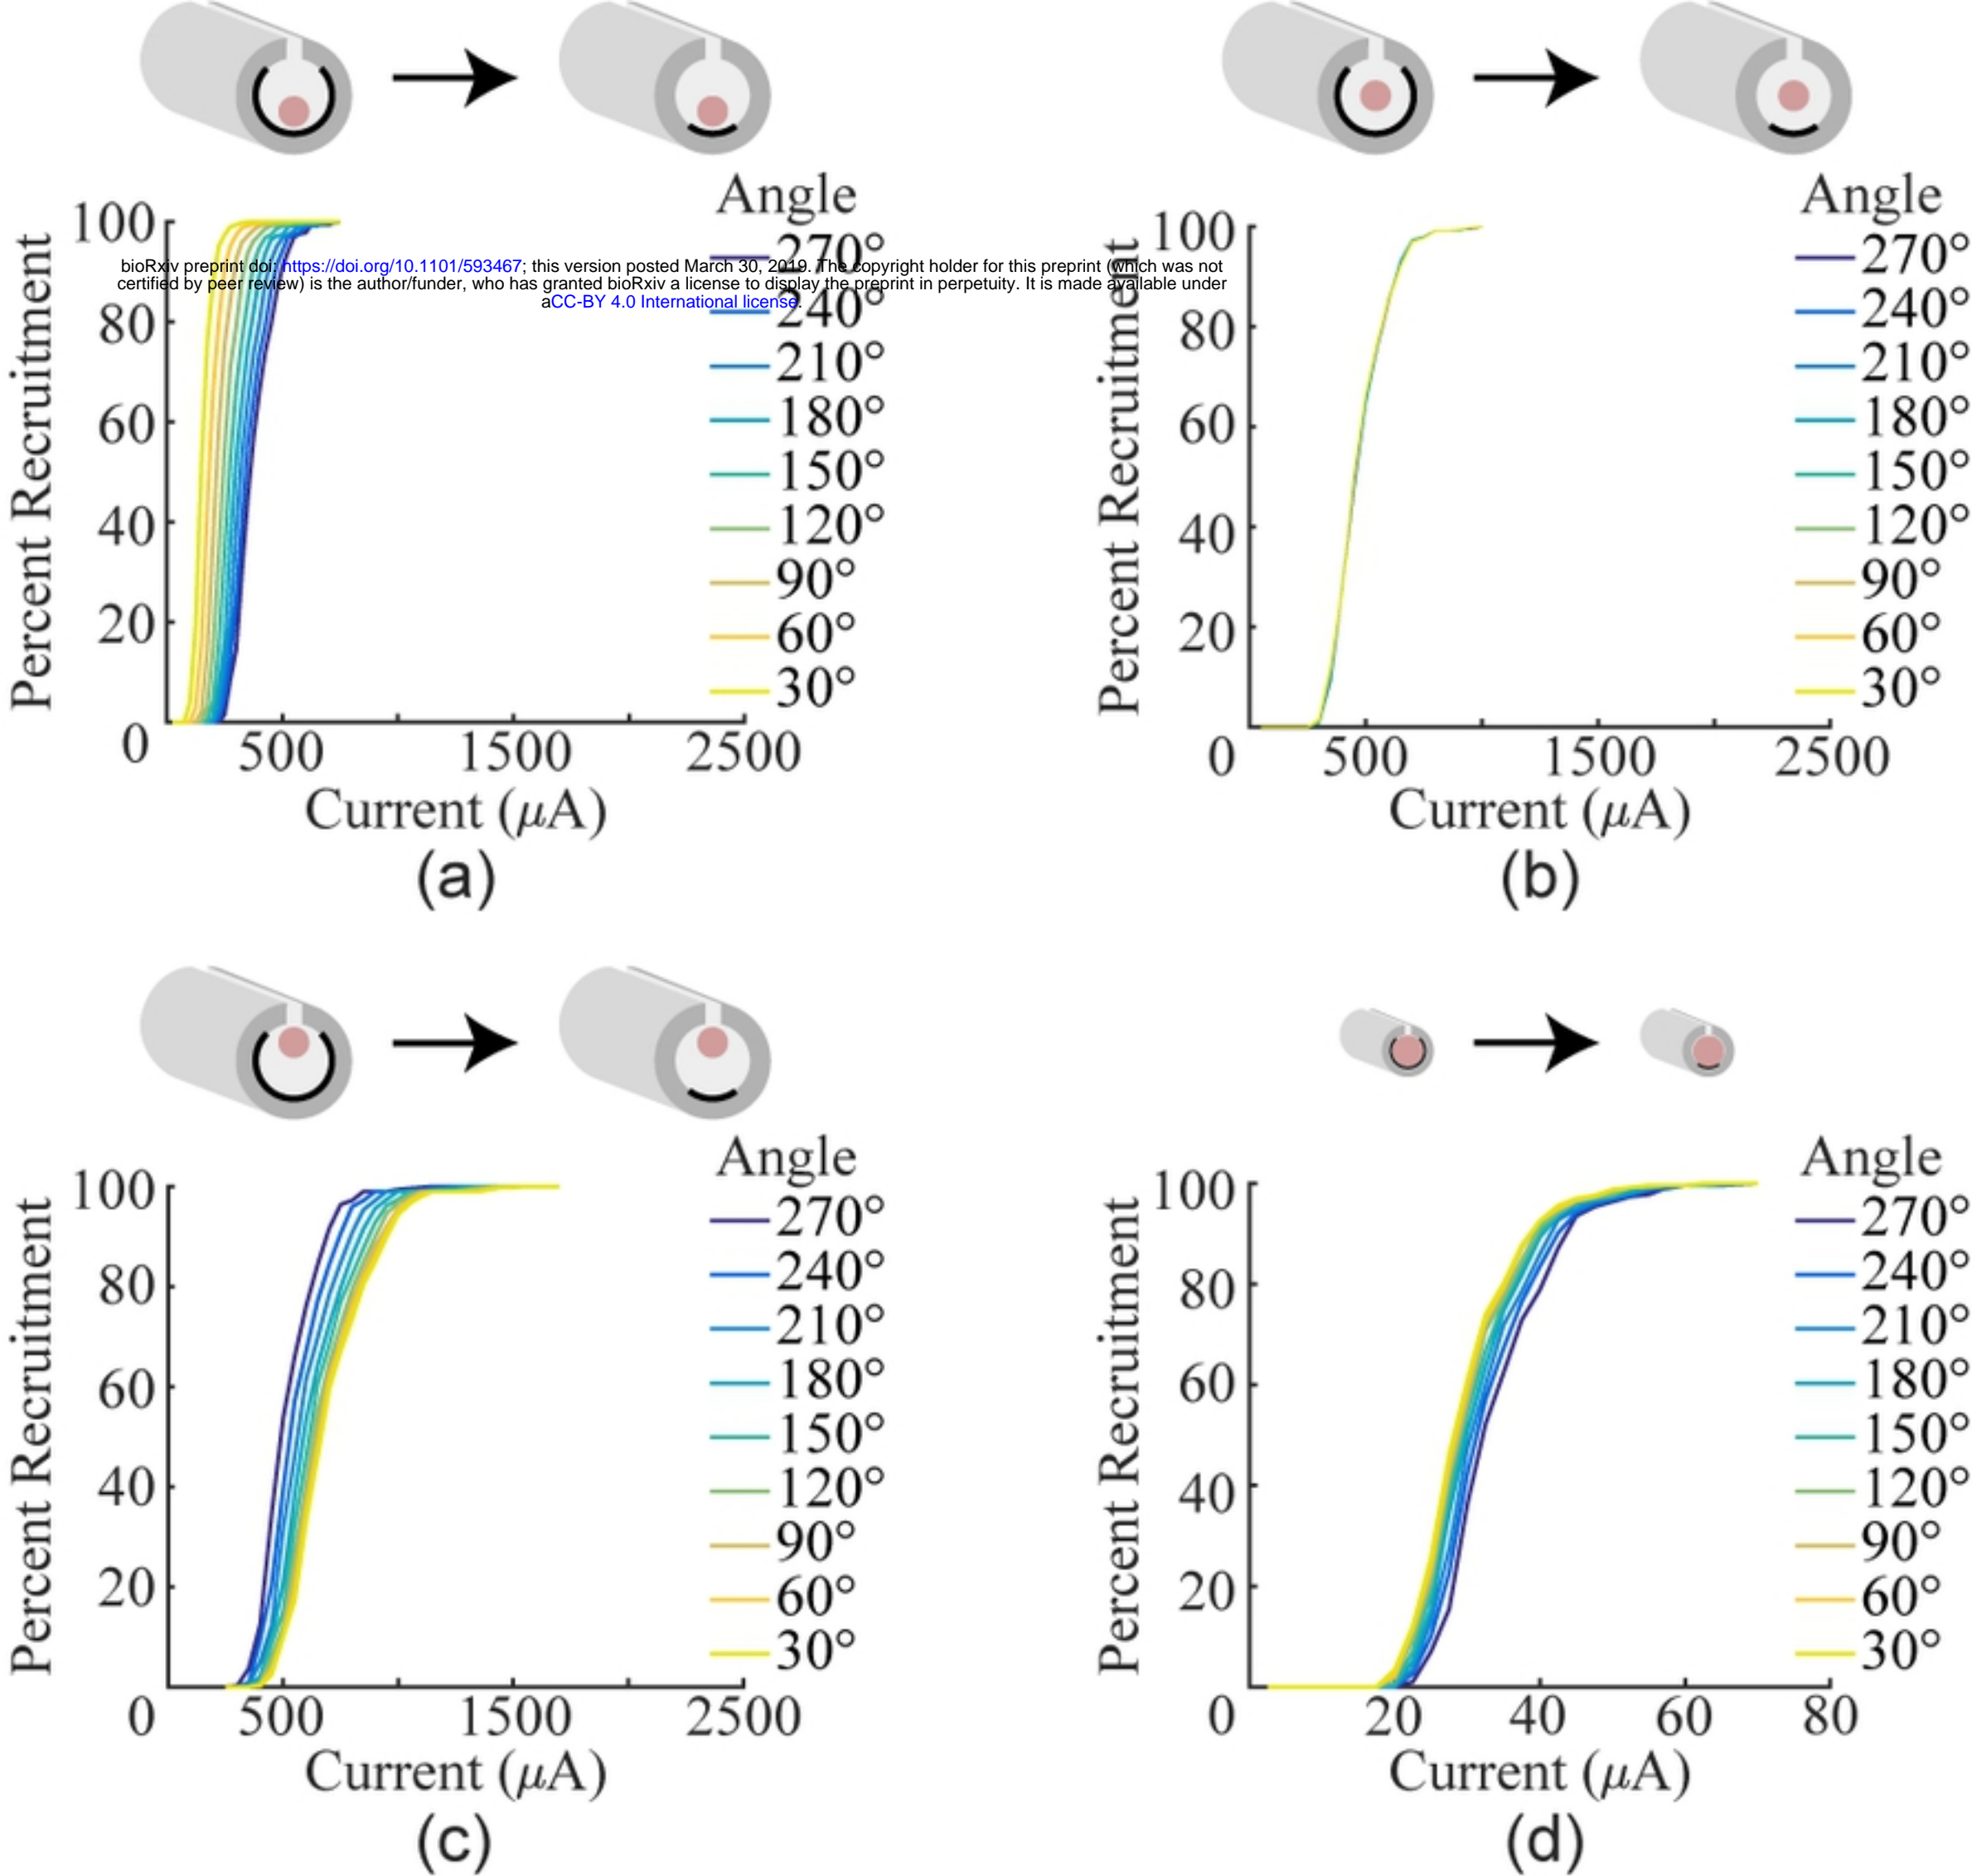

Fig4

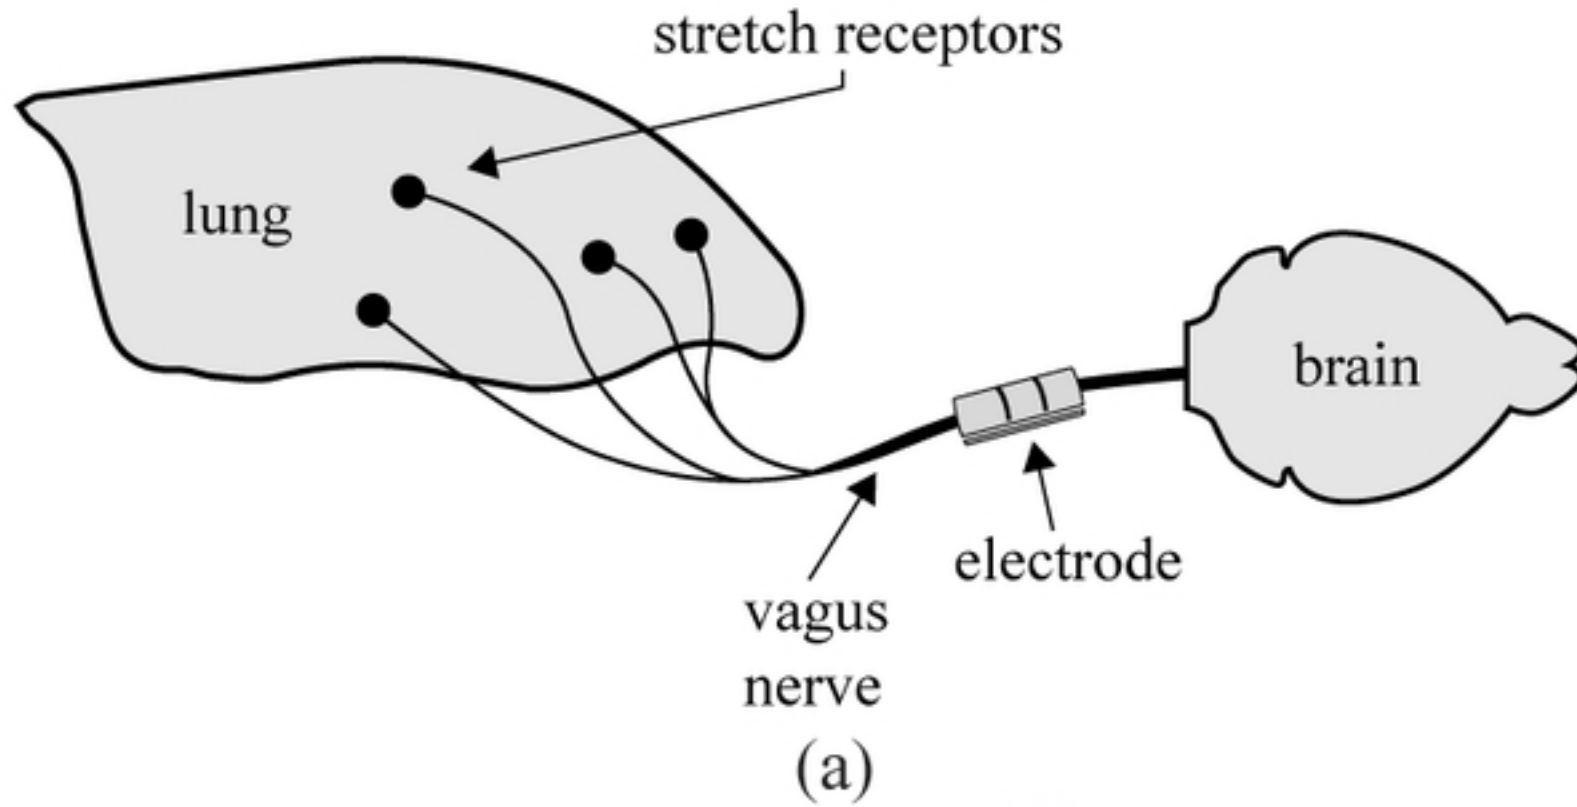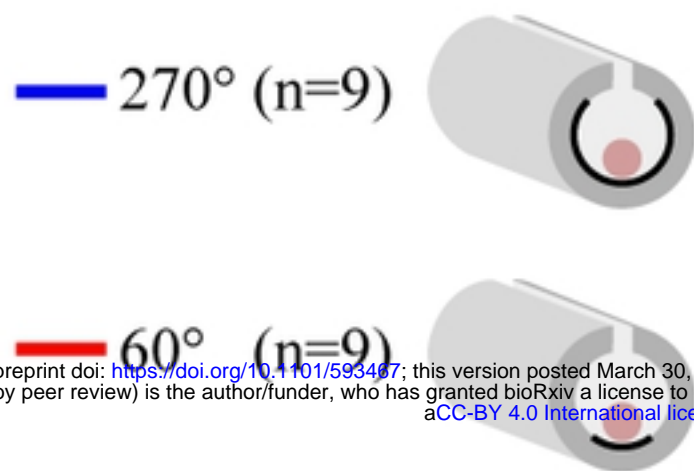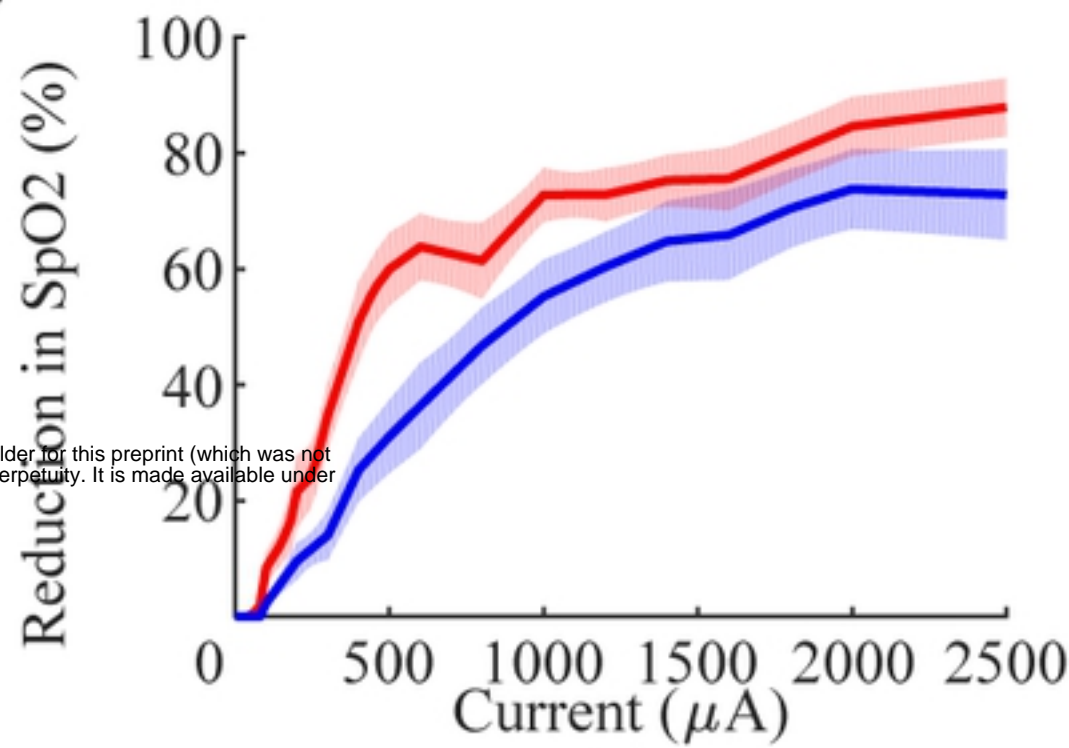

bioRxiv preprint doi: <https://doi.org/10.1101/593467>; this version posted March 30, 2019. The copyright holder for this preprint (which was not certified by peer review) is the author/funder, who has granted bioRxiv a license to display the preprint in perpetuity. It is made available under aCC-BY 4.0 International license.

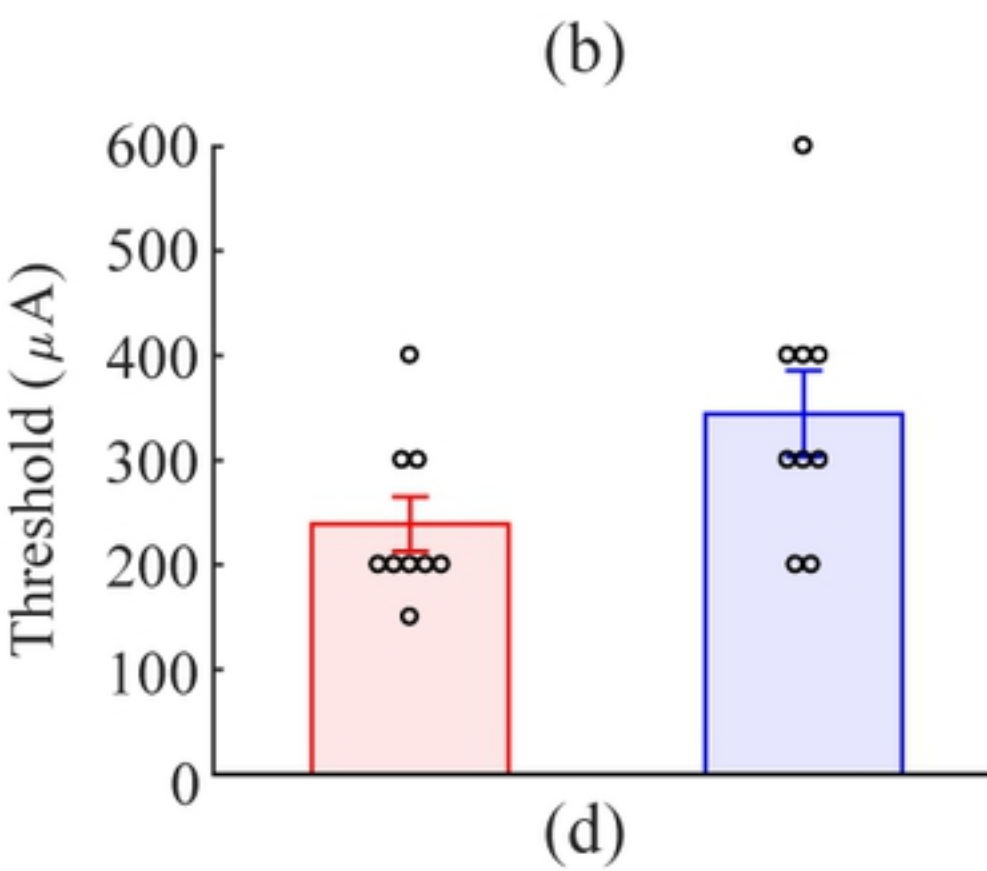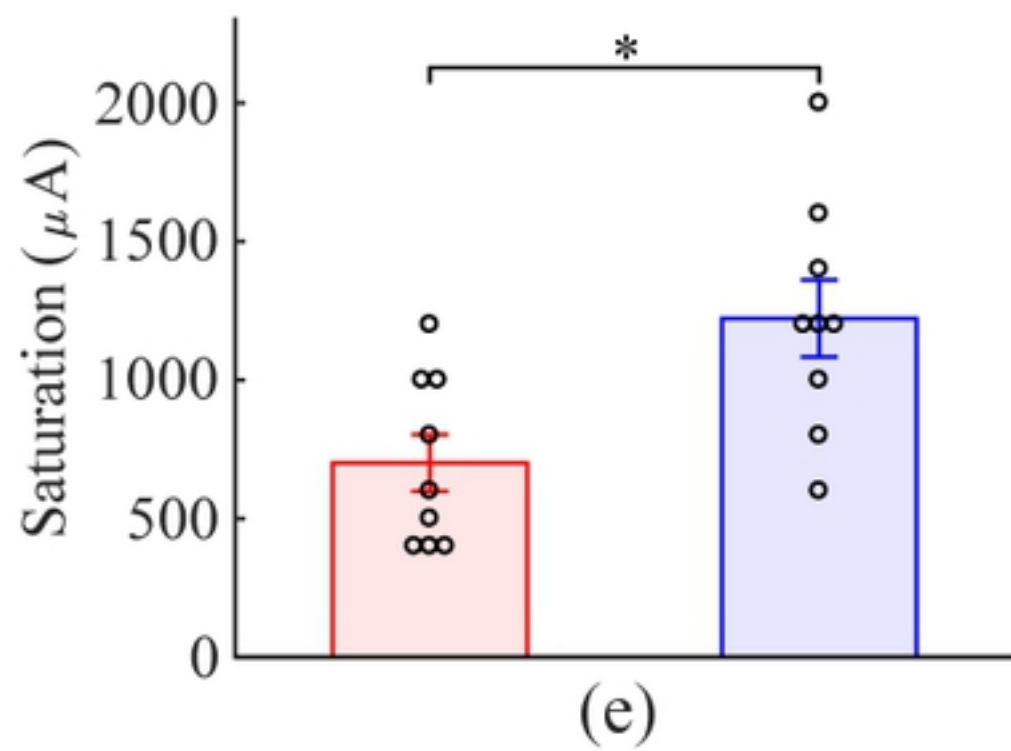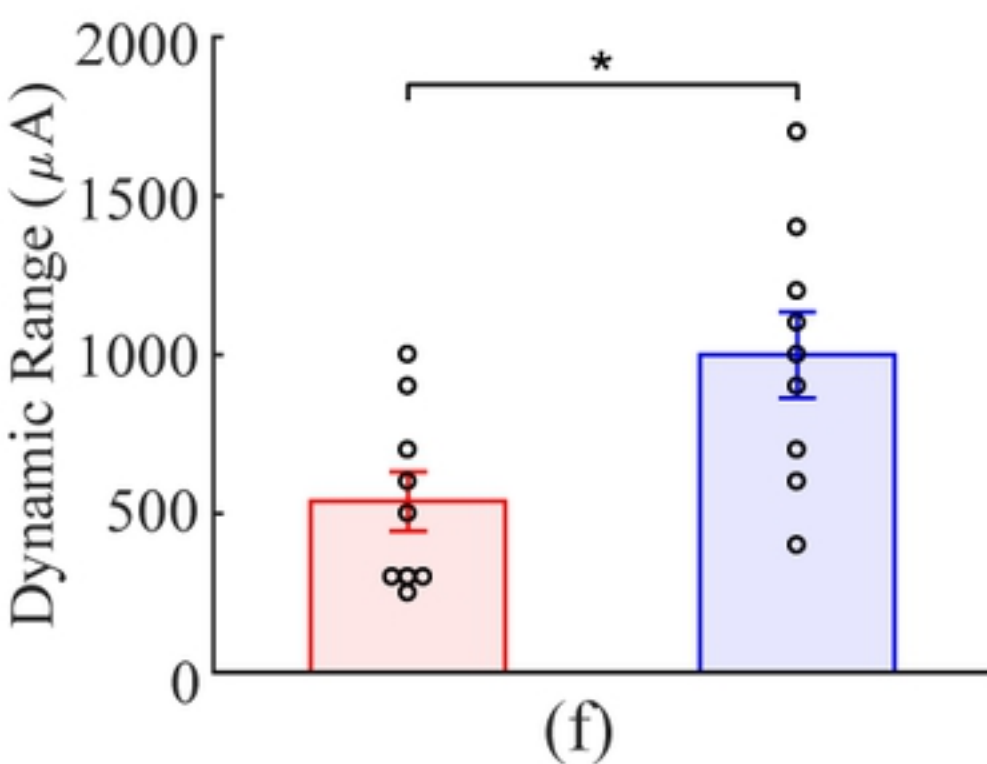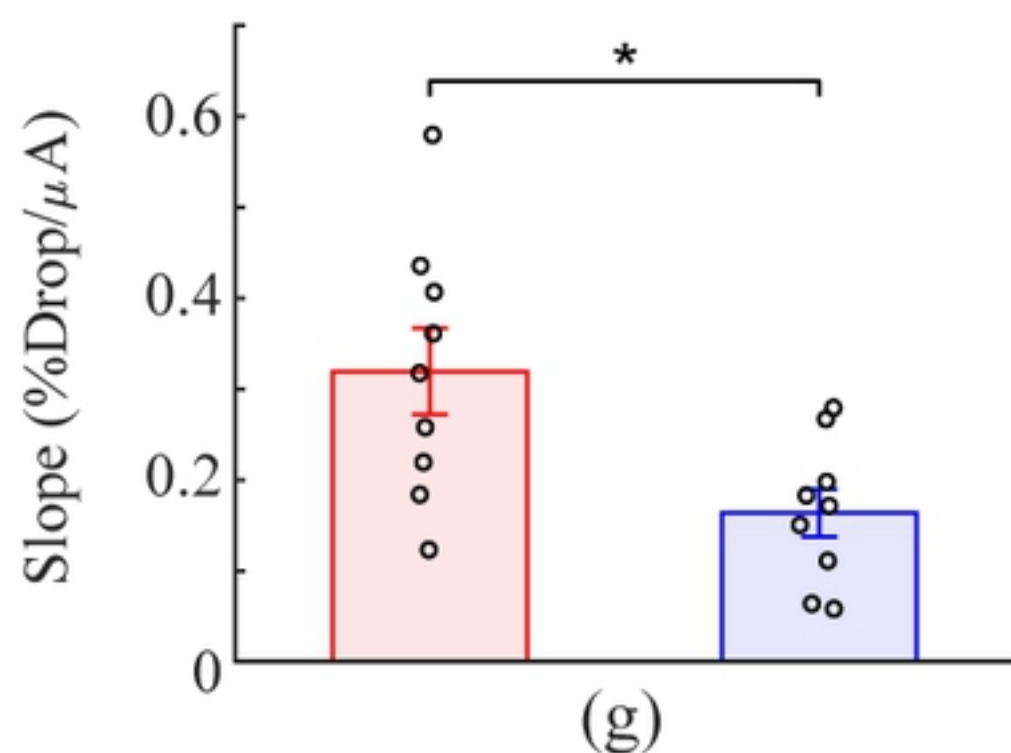

Fig5

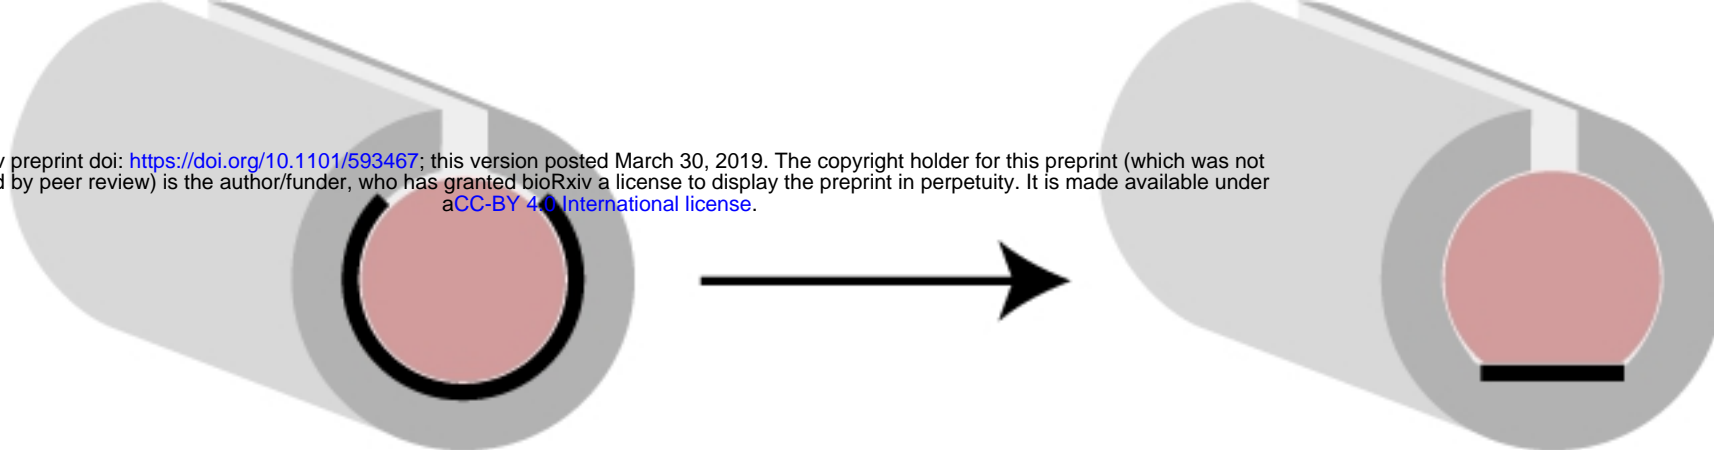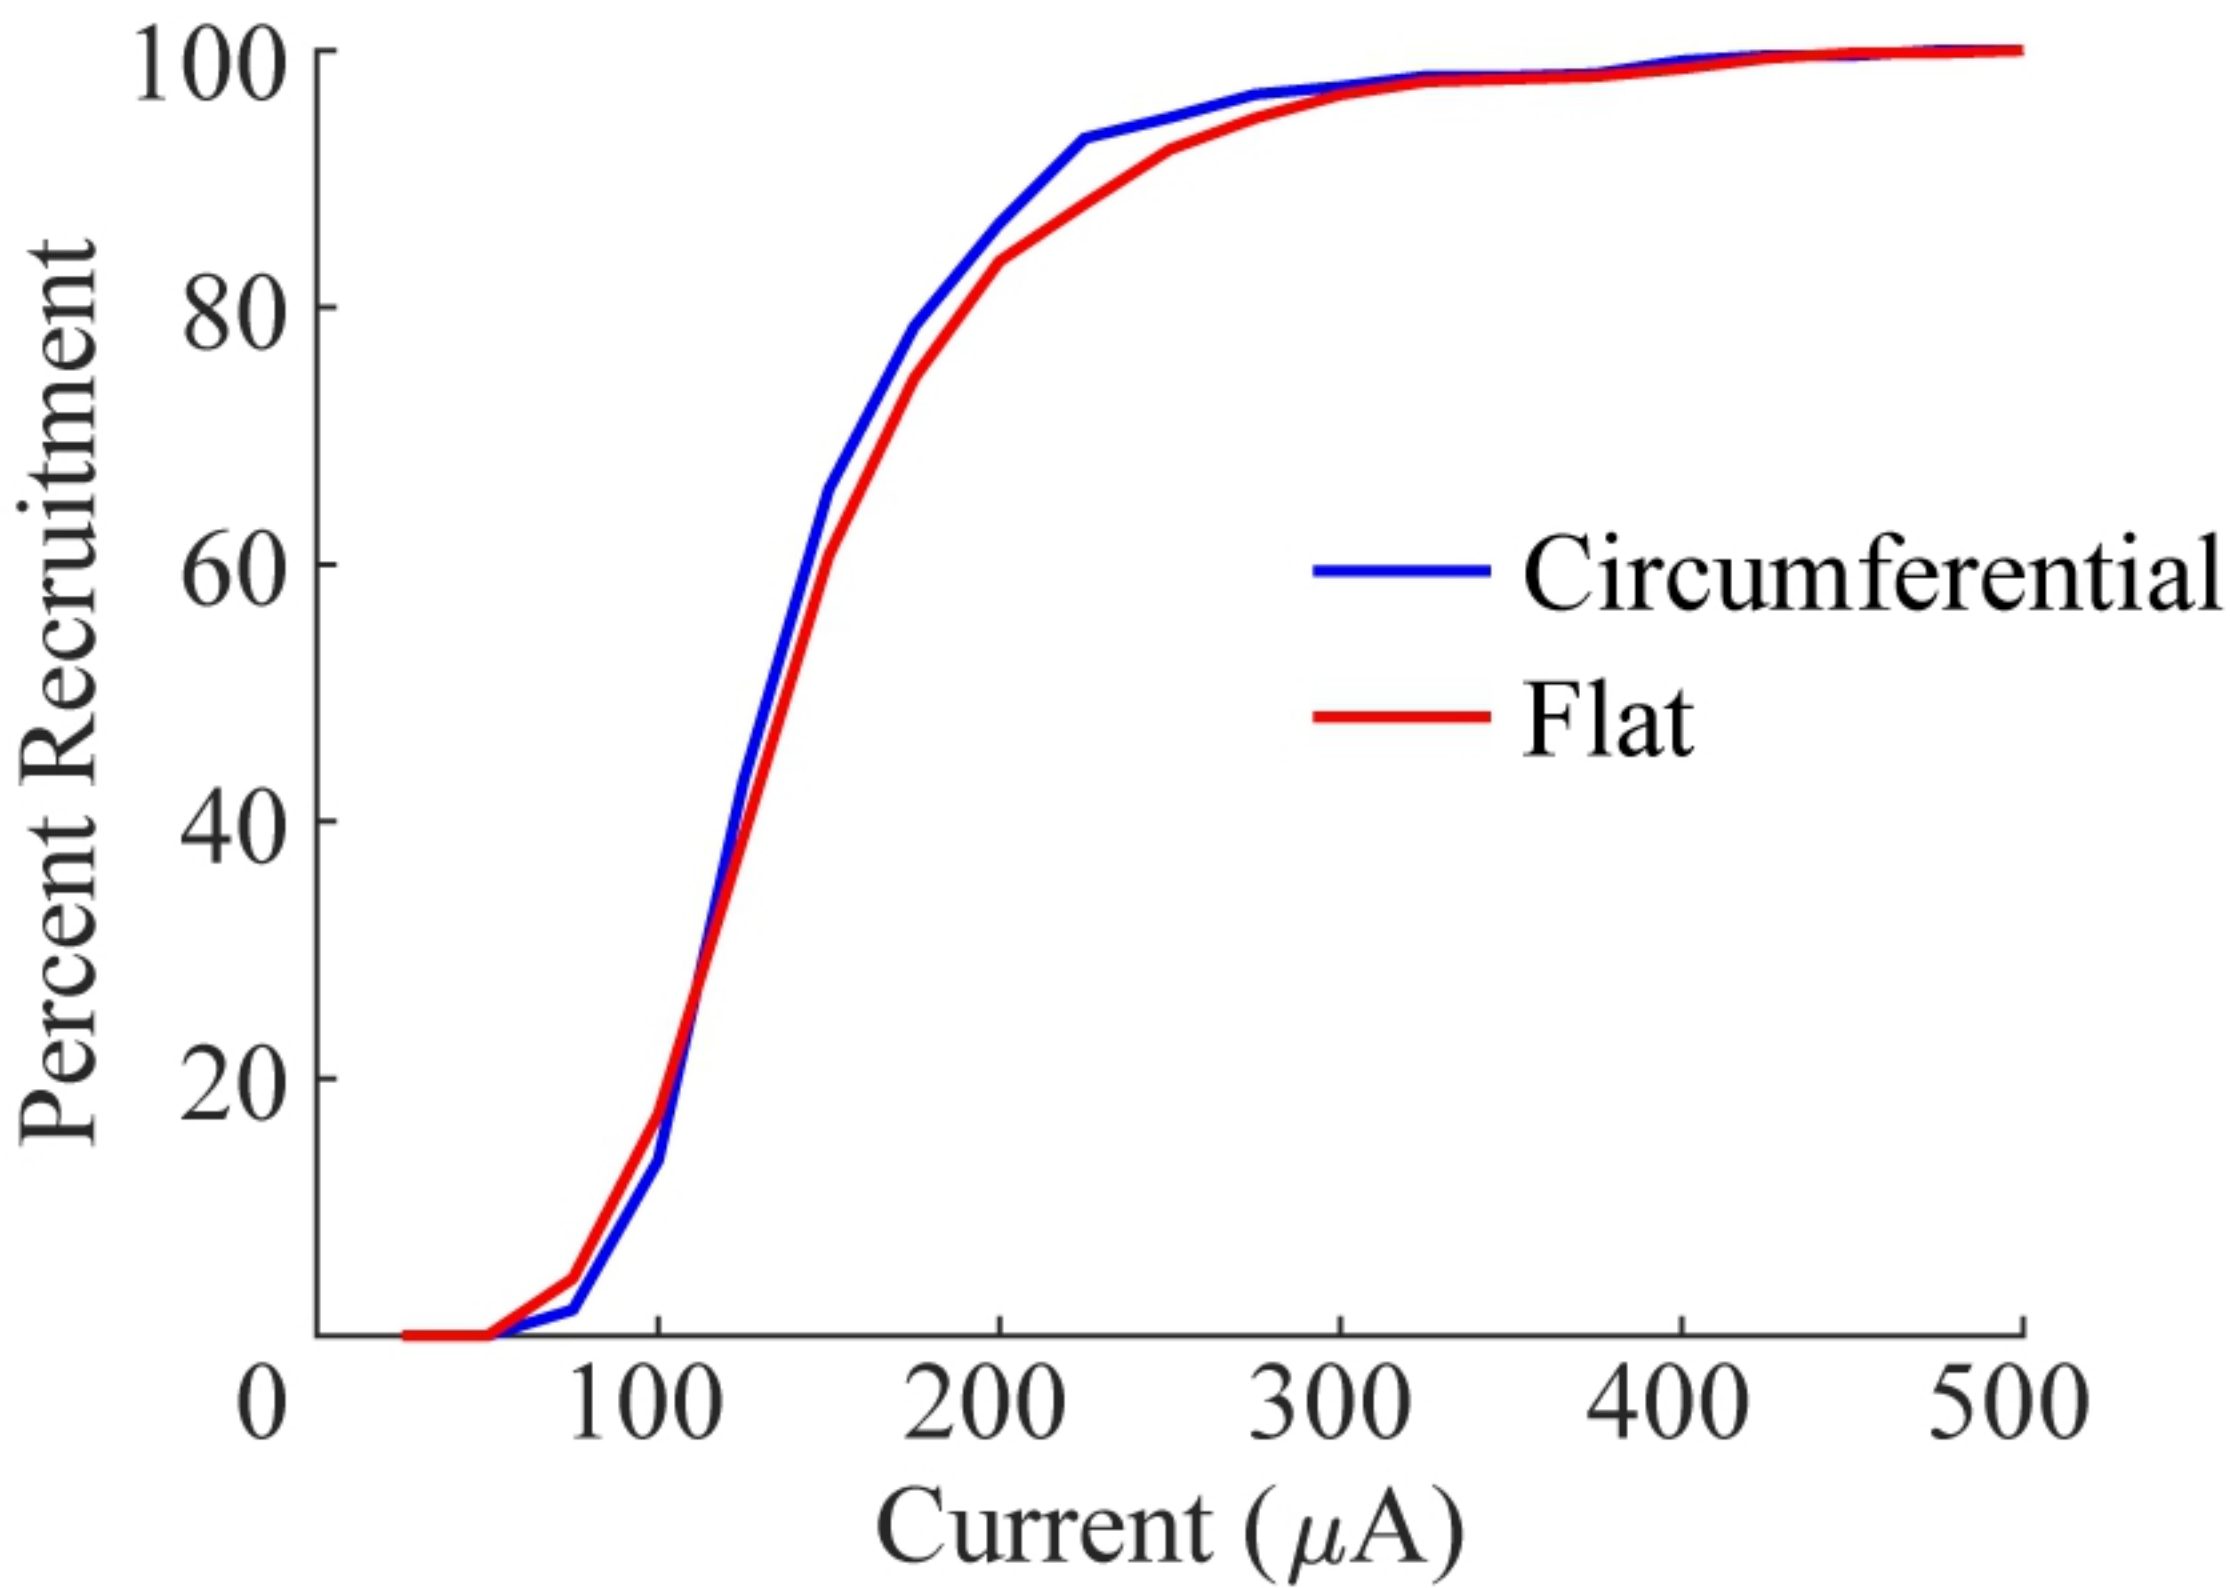

Fig6

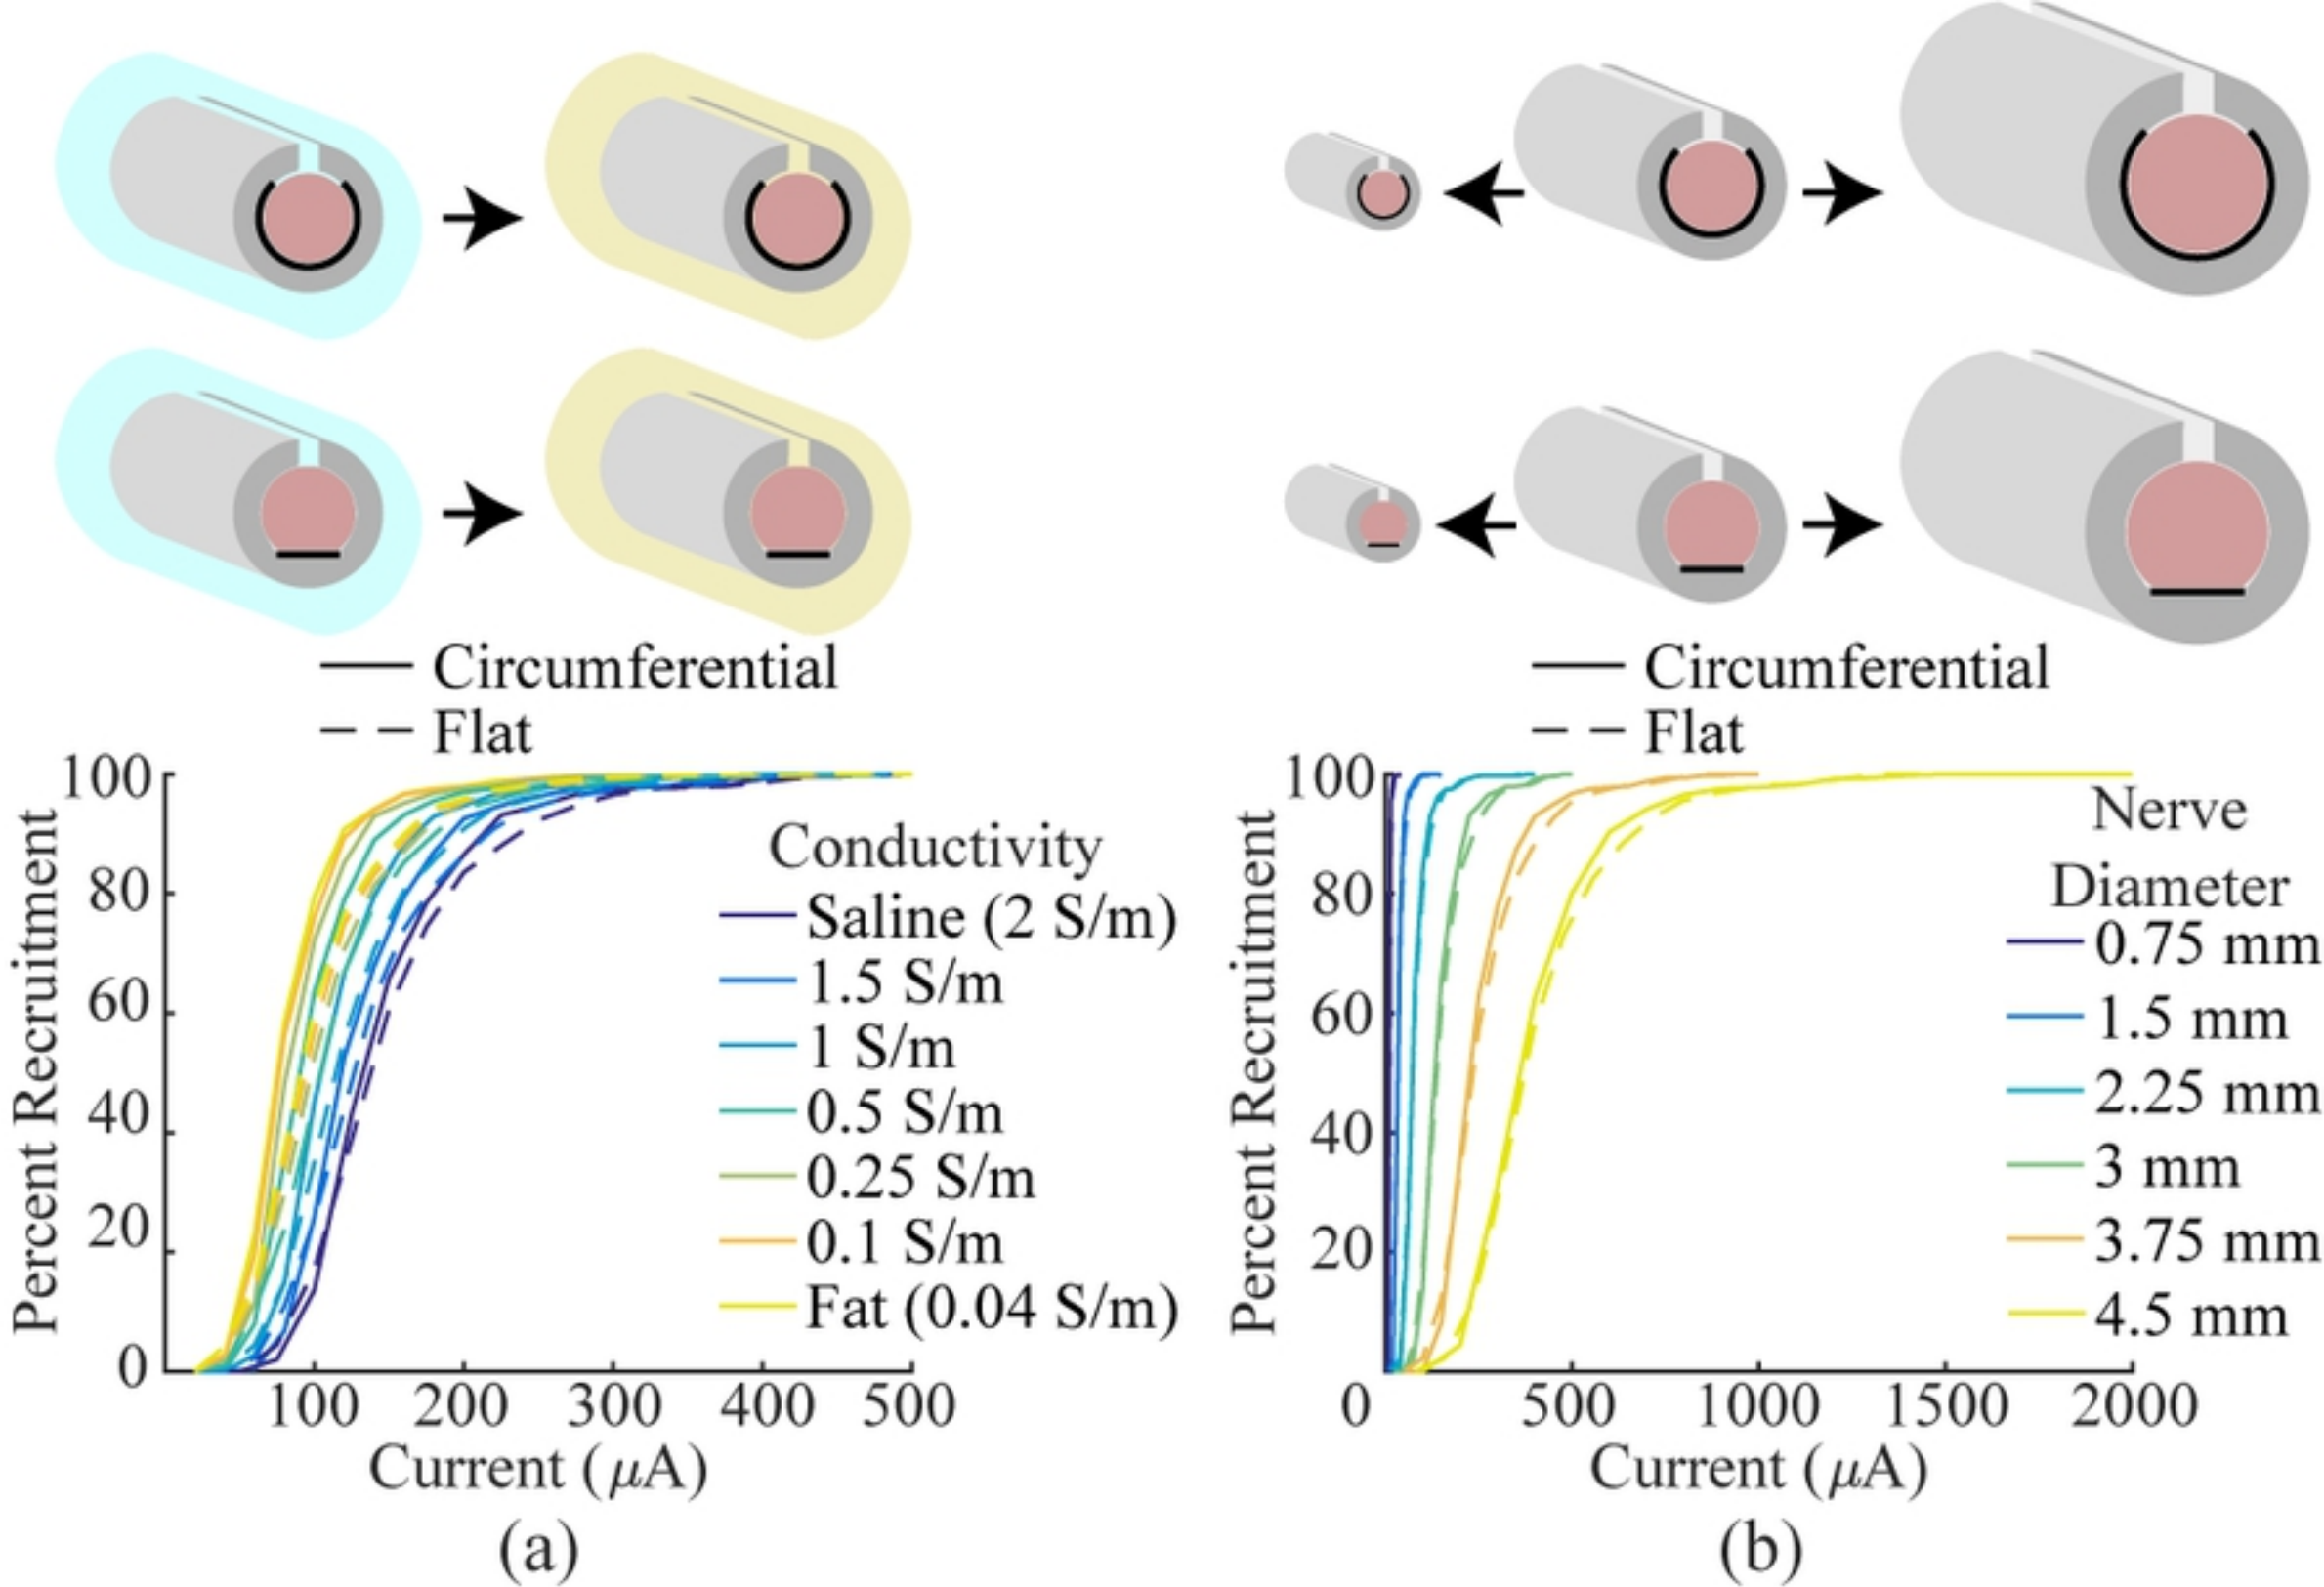

Fig7



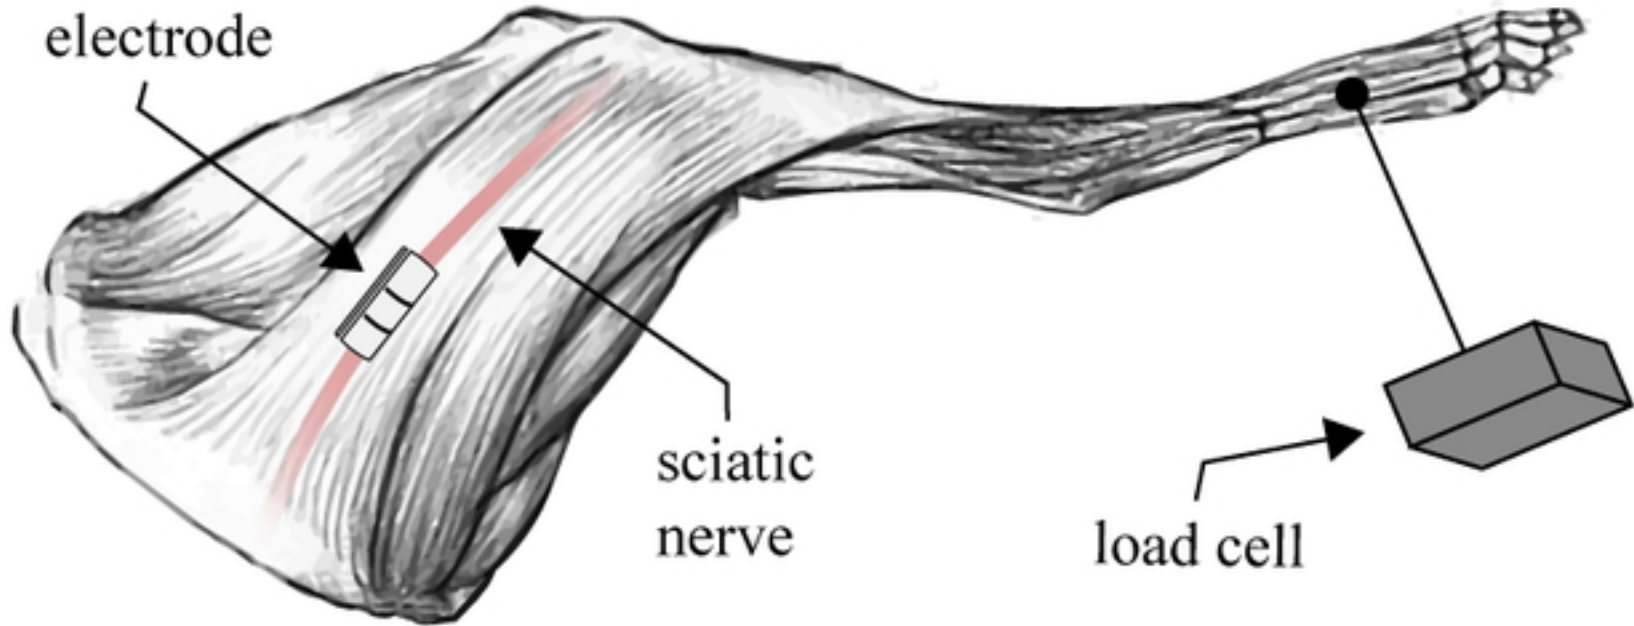

(a)

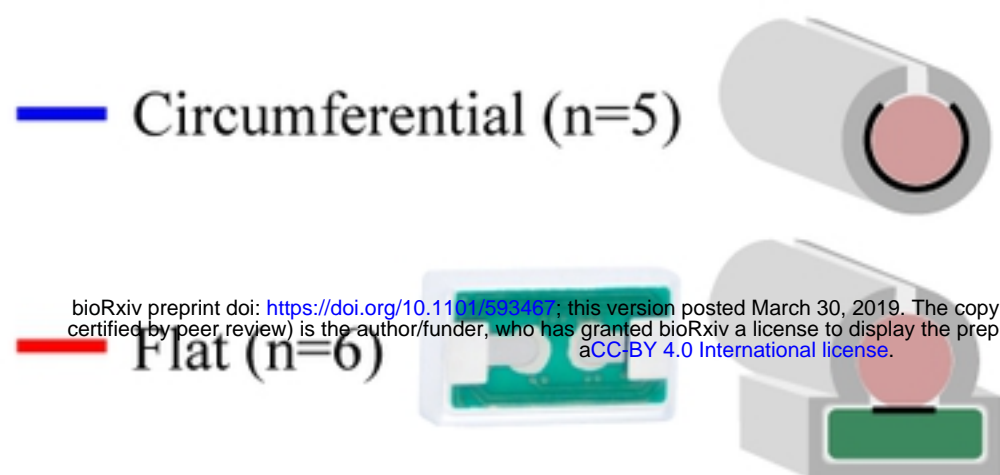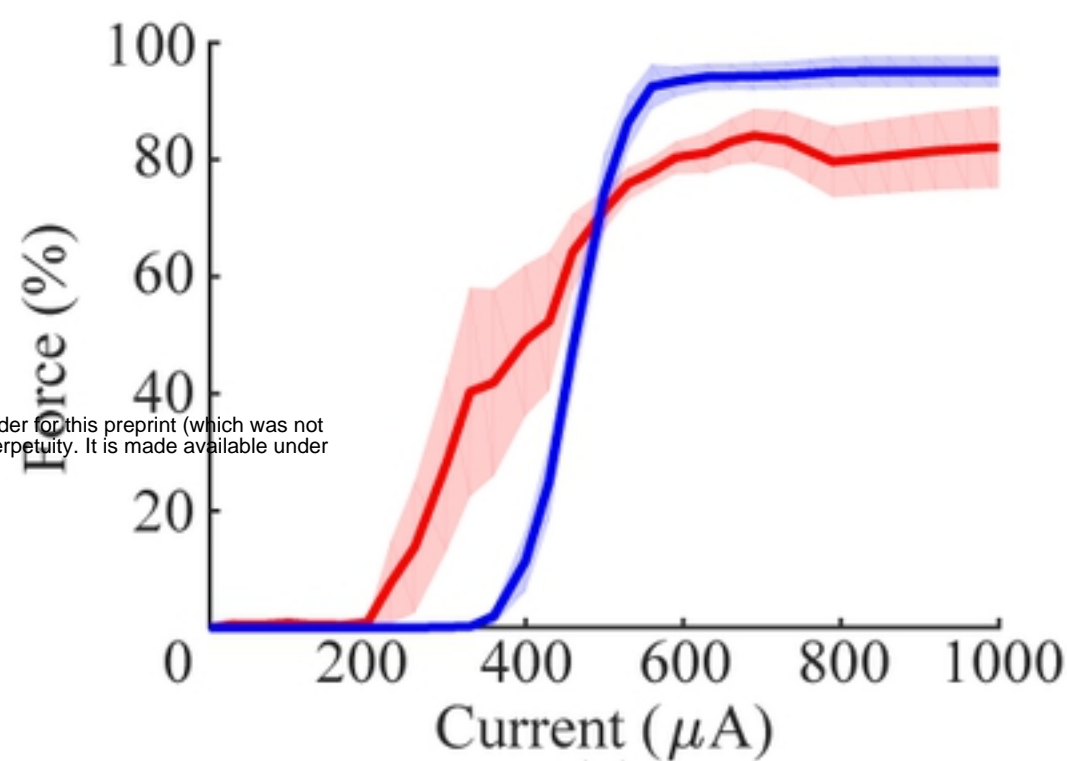

(b)

(c)

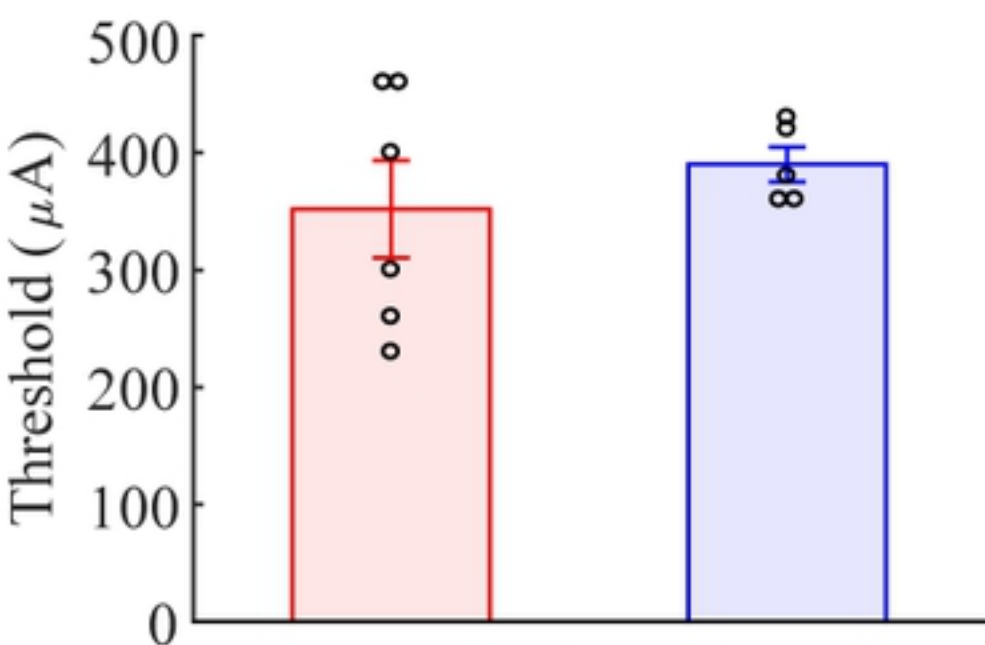

(d)

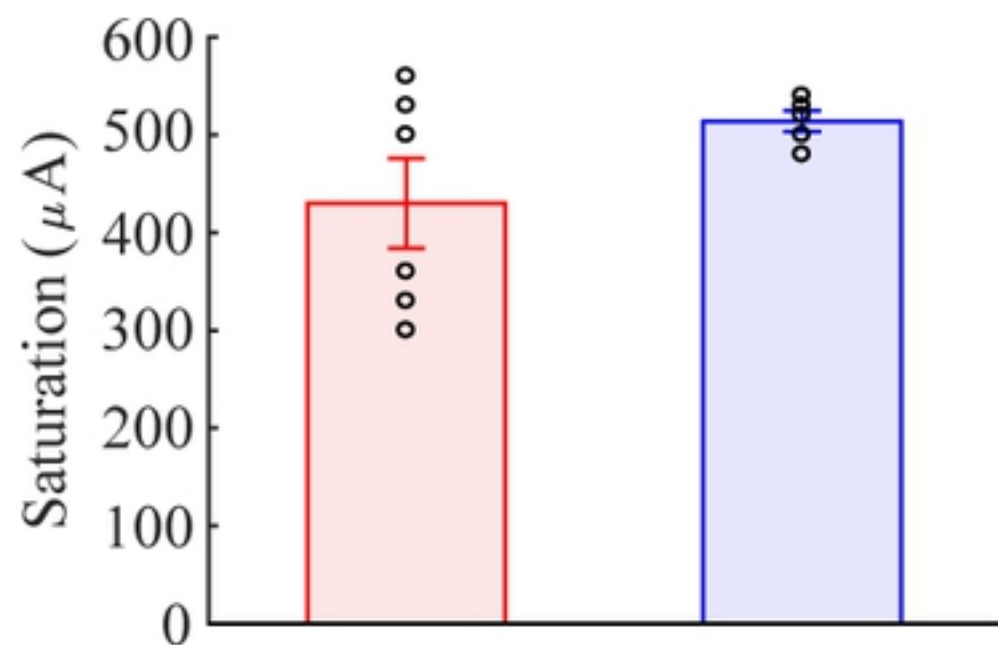

(e)

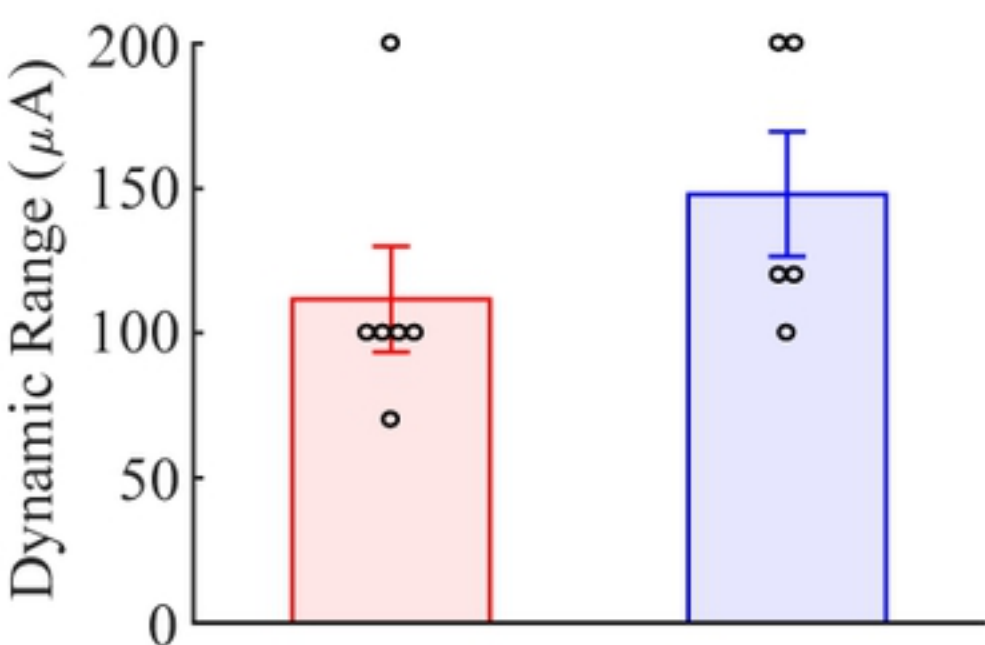

(f)

Fig8

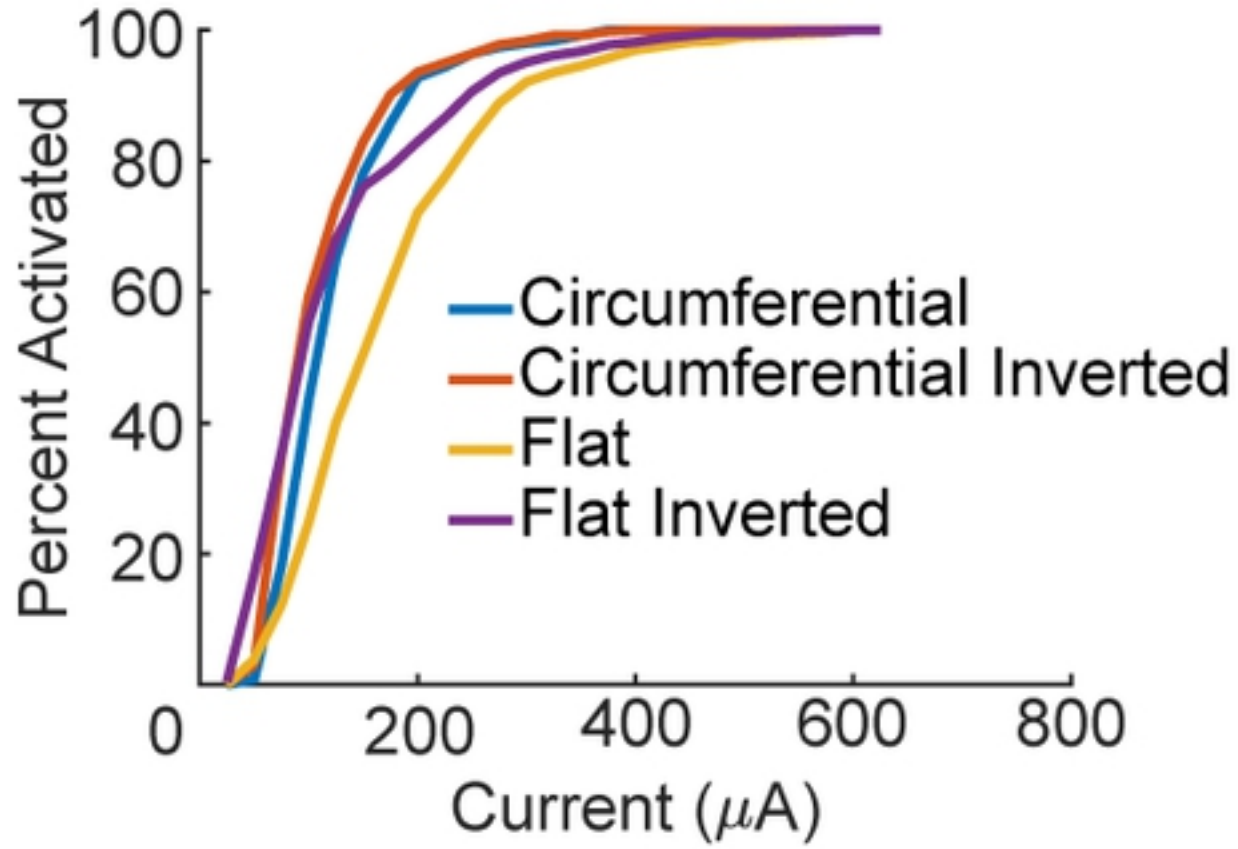

(a)

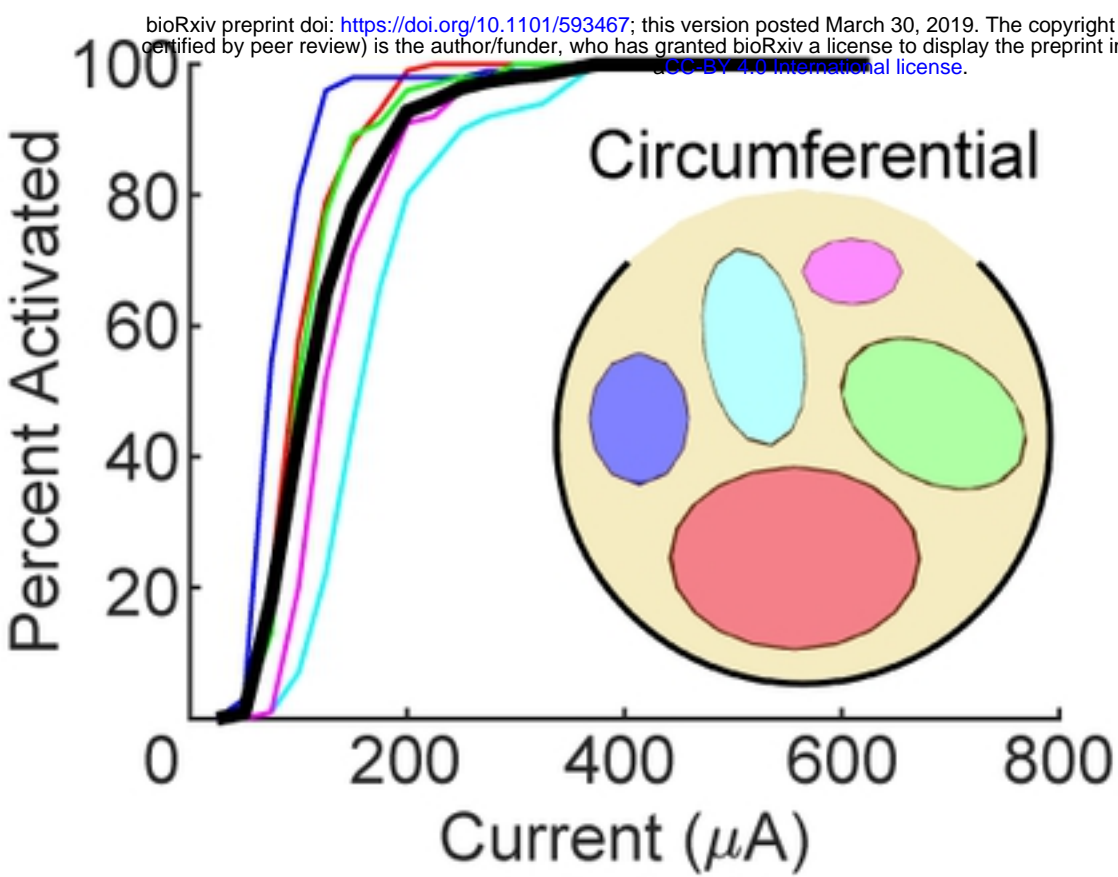

(b)

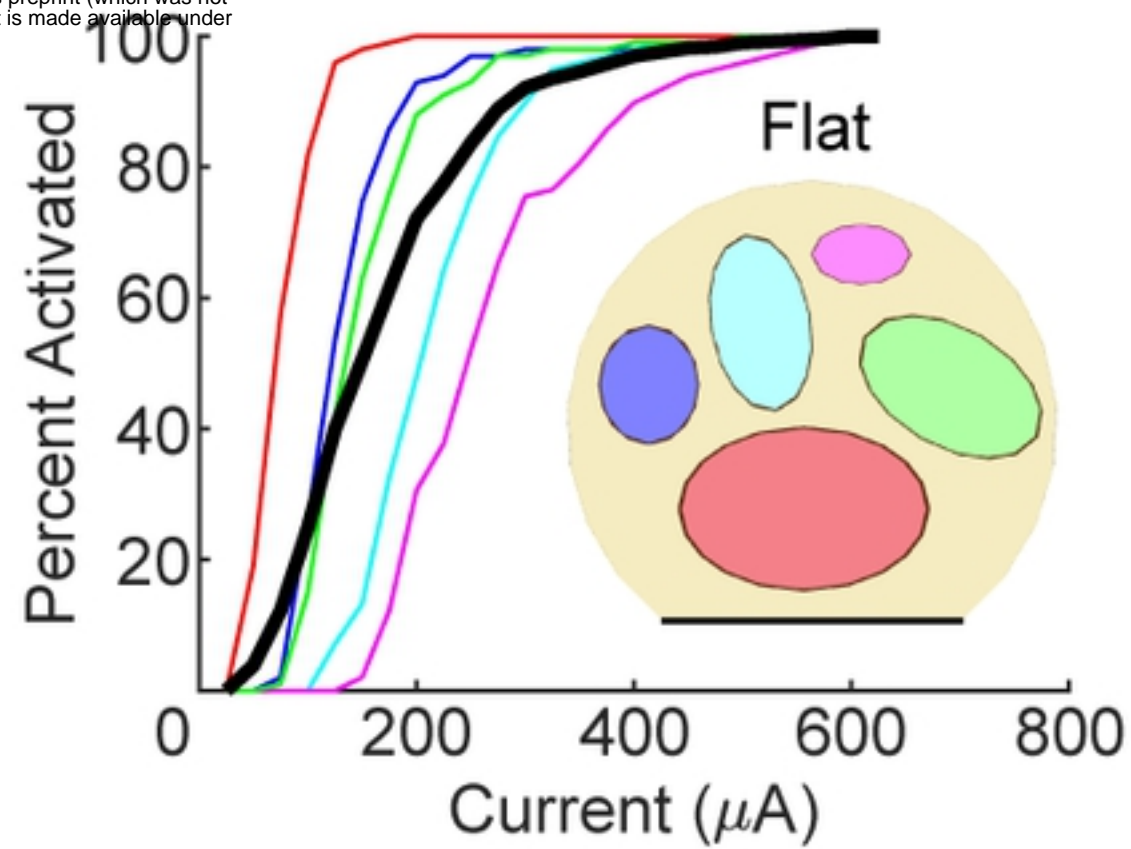

(c)

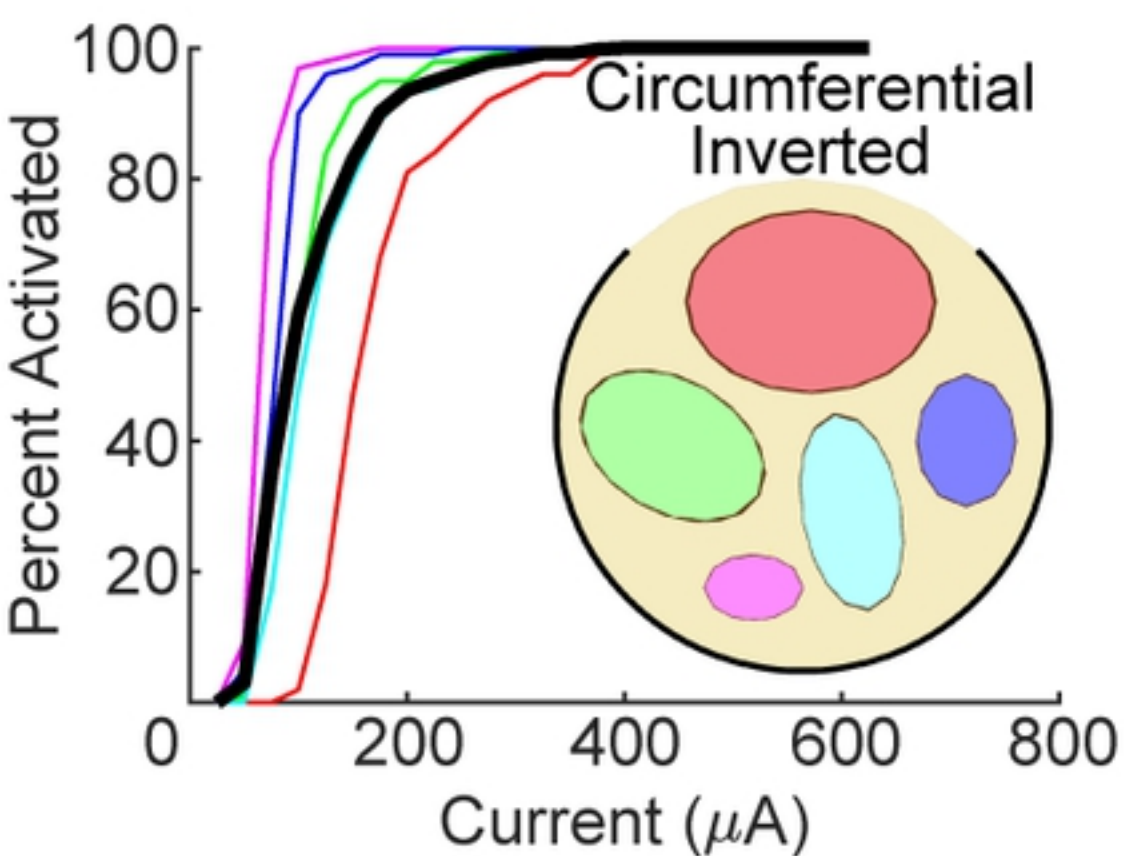

(d)

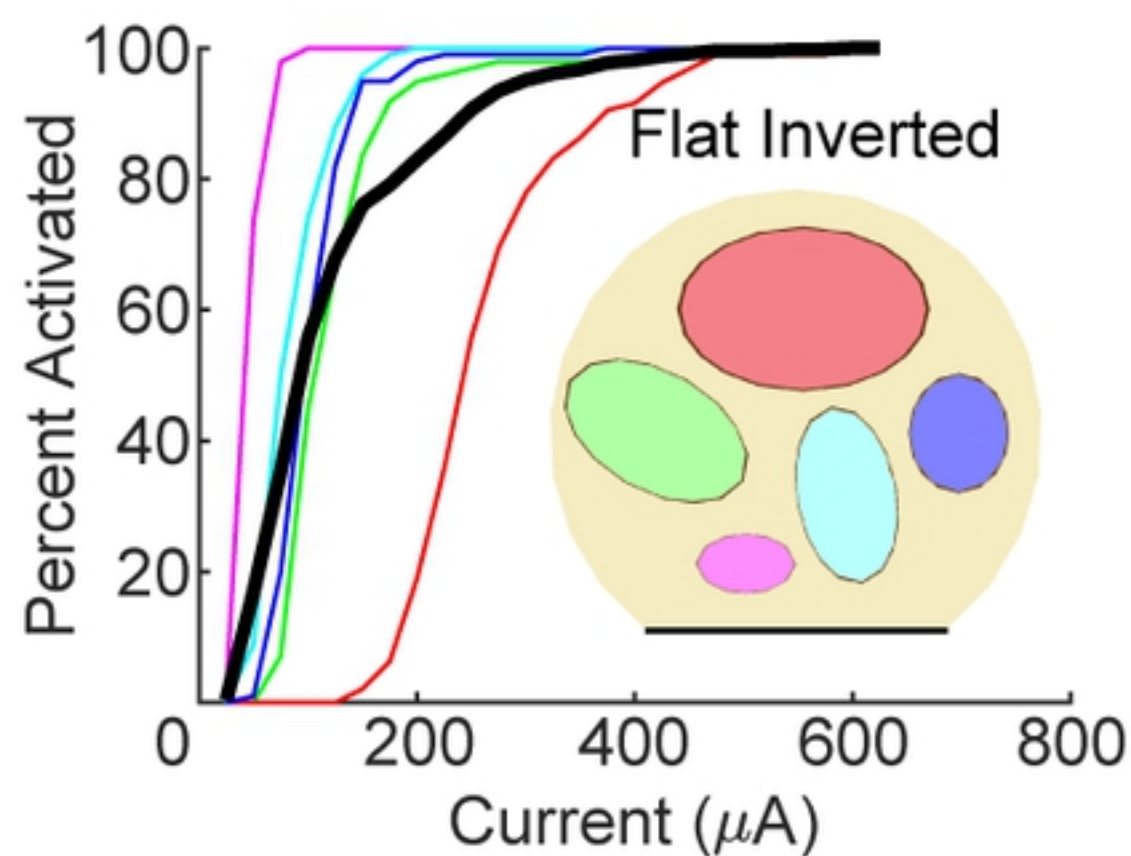

(e)

Fig9

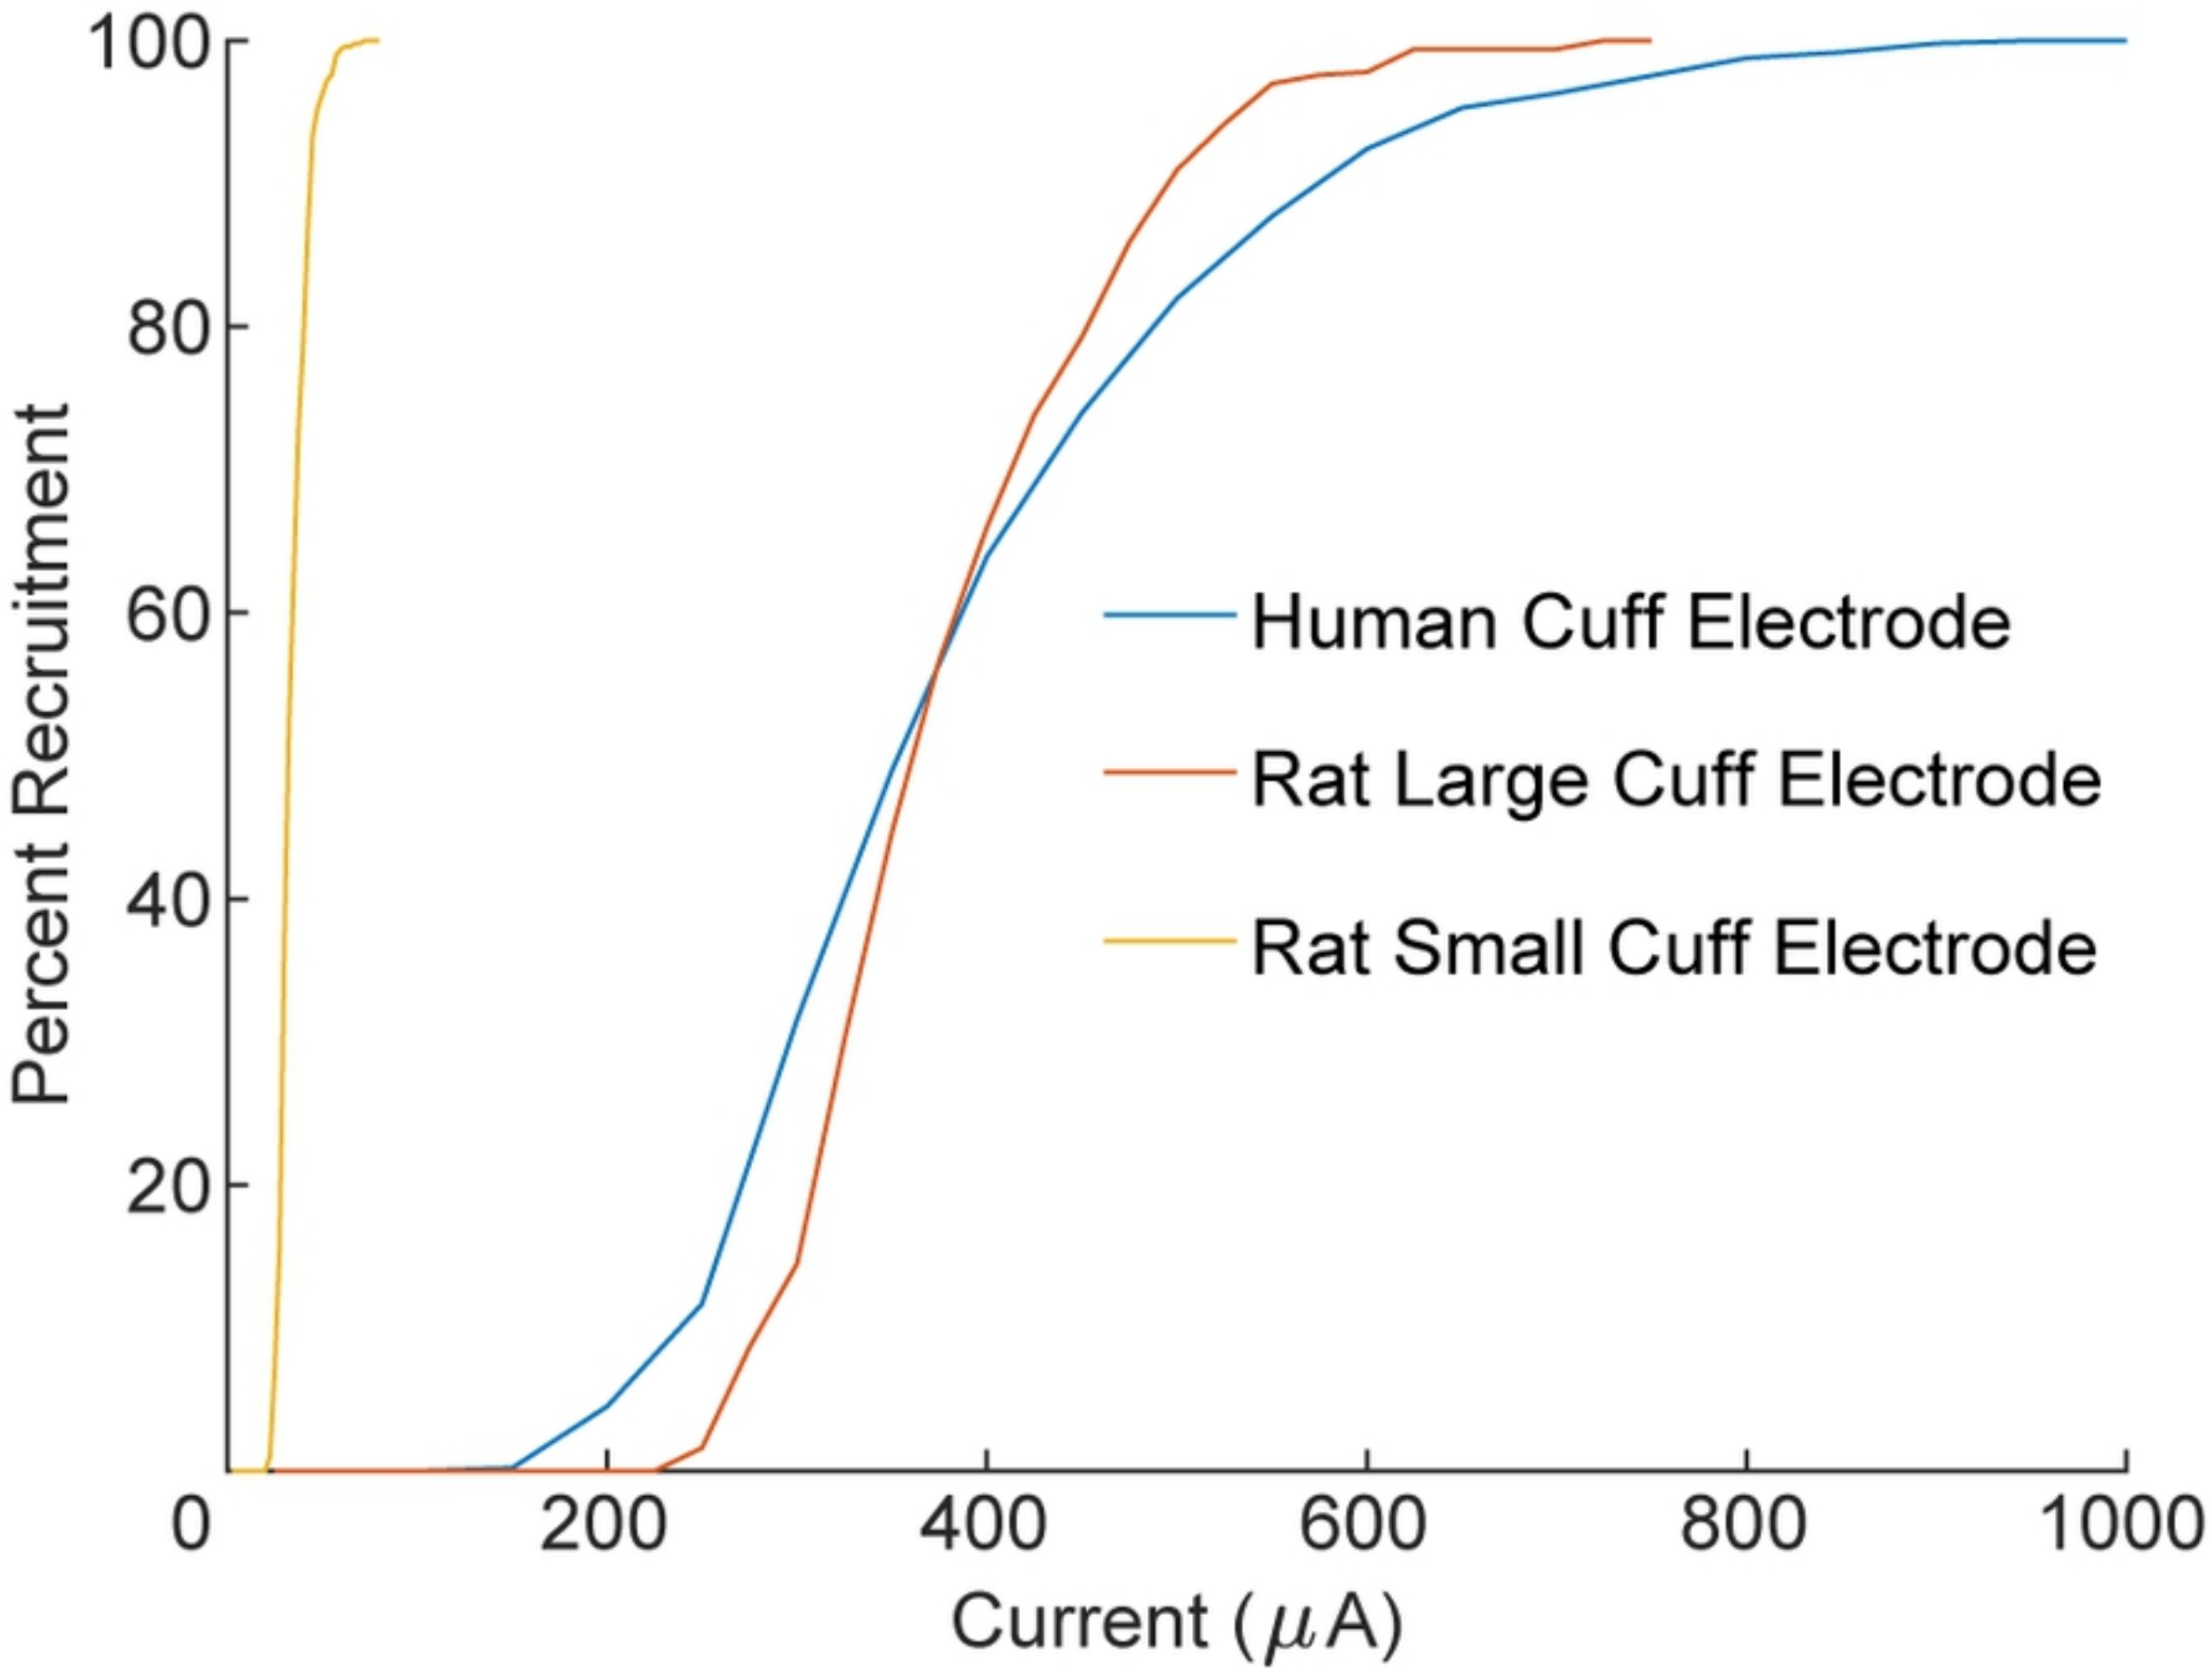

Fig10
